# Supplementary material for: Insensitivity of mass loss of Icelandic Vatnajökull ice cap to solar geoengineering
Source: Copernicus journal article supplement (doi:10.5194/tc-2021-318), 2021-10-19
Supplement: Supplementary file [file tc-2021-318-AC1-supplement.pdf]

# 1 Reviewer 1: Guðfinna Aðalgeirsdóttir

2

## 3 General comments

4 This manuscript seems to me to be a follow up to a previous study by same authors published in Earth's  
5 future (Yue et al. 2021) now with added ice flow model. The manuscript reads as uncompleted and  
6 hastily written afterthought that does not add much information to what was already published. Limited  
7 information about the models, limited understanding of ice dynamics (section 4 in particular) and poor  
8 presentation of the ensemble mean, rather than interesting results that the 4 ESM cause very different  
9 responses to the SAI, leaves reader with more questions than answers. Also, the fact that all the forcing  
10 fields are bias corrected (see comments below, some confusion about what is done) makes one wonder  
11 if any model dependent or physically caused impacts have been masked out with this bias correction and  
12 the observed responses therefore meaningless? Below are numerous comments about presentation and  
13 needs for clarifications. This manuscript needs major revisions.

14

15 Thanks, we have improved our manuscript significantly according to your valued suggestions. We have  
16 added the description of the four ESM responses to climate scenarios in Results section. The point of  
17 ISIMIP bias correction is to ensure the mean state of the model parameters match observations. The trend  
18 separate model trends over the observational period remain. This the bias correction ensures that models  
19 begin in close to an observed state. The separate ESM without bias correction have differences from  
20 observations e.g. several °C, and using these raw outputs would produce SMB that differed hugely from  
21 reality since those few degrees can make the difference between melting and not on the ice cap. The  
22 trends preserved by the bias correction allow very different future temperatures entirely driven by the  
23 ESM themselves. The commonly used method of looking at anomalies relative to a control scenario are  
24 not likely to work as well as bias correction where the non-linear change at the melting point in SMB  
25 mean that temperatures are important to get as correctly as possible. Thus, trend-preserving bias  
26 correction seems not only a logically consistent methodology, but an essential one if one wants to get an  
27 accurate SMB.

28

29 We have explained the statistically downscaling method more detailed. We have added a new section,  
30 2.3: SMB modelling:

31 "In this study, the SMB fields used to drive PISM are from Yue et al. (2021), and estimated by SEMIC  
32 under the historical, G4, RCP4.5 and RCP8.5 scenarios during 1982–2089. SEMIC in turn is driven by  
33 downscaled and bias-corrected ESM data including temperatures, windspeeds, pressures, humidities and  
34 radiative forcing terms. We use all CMIP5 and GeoMIP ESM that have complete data fields available,  
35 namely BNU-ESM, HadGEM2-ES, MIROC-ESM, and MIROC-ESM-CHEM (Table 1). We statistically  
36 downscaled the ESM forcing based on the ERA5 reanalysis dataset (Hersbach et al., 2020). The point  
37 of the bias correction is to ensure the mean state of the model parameters matches observations. The  
38 separate model trends within each ESM over the observational period remain the same. Thus, the bias  
39 correction ensures that models begin close to an observed state, but can then diverge as the separate  
40 model climate dictate. The spatial resolution of ERA5 is about 30 km, but still cannot capture the VIC  
41 topography. To address this, we first downscaled ERA5 climate to 0.025°×0.025° grid based on their

42 correlation with VIC surface elevation. We find surface elevation is well correlated with near-surface  
43 temperature ( $R=0.83$ ,  $p<0.01$ ), downward longwave ( $R=0.77$ ,  $p<0.01$ ) and shortwave radiation ( $R=0.74$ ,  
44  $p<0.01$ ) and specific humidity ( $R=0.77$ ,  $p<0.01$ ), with lapse rates of  $-5.4\text{ }^{\circ}\text{C km}^{-1}$ ,  $-11.9\text{ W m}^{-2}\text{ km}^{-1}$ ,  $15.85$   
45  $\text{W m}^{-2}\text{ km}^{-1}$  and  $-0.59\text{ k k}^{-1}\text{ km}^{-1}$ , respectively. Precipitation and snowfall are downscaled following De  
46 Ruyter-de Wildt et al. (2004). The former is downscaled using Kriging interpolation method, with its  
47 empirically exponential relationship with observed surface elevation. The latter is assumed equal to  
48 precipitation rate when the daily mean air temperature is below  $3^{\circ}\text{C}$ , otherwise no snowfall occurs. Other  
49 SEMIC driven fields (surface wind speed, air density, pressure) are simply bilinearly interpolated due to  
50 the relatively minor effects on SMB in SEMIC. Then, we use the downscaled  $0.025^{\circ}\times 0.025^{\circ}$  forcing  
51 fields as the observational reference climate to downscale and bias-correct the ESM fields using the  
52 ISIMIP approach (Hempel et al., 2013). The ISIMIP is a trend-preserving approach so that the long-term  
53 climate trends in models are preserved, while the mean at each grid cell is matched to observations. There  
54 are two fundamentally different ways ISIMIP can do the correction: addition and multiplication, and we  
55 follow ISIMIP protocol in deciding which method to use for each meteorological field variable (Hempel  
56 et al. 2013). The additive approach is used for most fields preserving, e.g. the absolute changes of the  
57 monthly temperature; while the multiplicative method is used for preserving the relative changes for  
58 precipitation and radiation. Finally, these  $0.025^{\circ}\times 0.025^{\circ}$  fields were used to drive the SEMIC model. We  
59 also bias-corrected VIC surface albedo and considered SMB-elevation feedback in all simulations (Yue  
60 et al., 2021). Over the whole VIC, modelled SMB over the period 1991–2010 (Fig. 1d, Fig. 2) is well  
61 correlated ( $R=0.6$ ,  $p<0.05$ ) with an interpolated map from 60 measurement sites (Björnsson et al., 2013),  
62 although the mean is overestimated by  $0.61\text{ m yr}^{-1}$ .”

## 65 Specific comments:

66 The title of the manuscript is misleading and even misleading. What is “solar geoengineering”? first  
67 guess would be that some engineering is done to the sun, this phrase is not used again in the paper, but  
68 “stratospheric aerosol injection” which is not directly related to “solar geoengineering”, my suggestion  
69 is to be consistent throughout the paper about what is being discussed, injection in the stratosphere is not  
70 affecting the sun, is it? Also, the mass loss of ice caps is dependent on the energy balance at the surface,  
71 flow speed, size and location, how the connection to geoengineering is made, I find lacking explanation  
72 (see comments below). My suggestion is to change the title to suit better the content of the paper.

73  
74 Solar geoengineering is the common umbrella terminology for technologies that alter shortwave radiative  
75 balance, and can be accomplished in many ways, but it seems to be unfamiliar. So based on your  
76 suggestion, we changed the title to “Insensitivity of mass loss of Icelandic Vatnajökull ice cap to  
77 stratospheric aerosol injection”, and added the description about the “stratospheric aerosol injection” in

78 Introduction section:

79 “Geoengineering by stratospheric aerosol injection (SAI) is designed to partially offset the longwave  
80 radiative forcing from increasing greenhouse gas concentrations in the atmosphere by reducing incoming  
81 solar radiation. Usually sulfate aerosols or their precursor,  $\text{SO}_2$  are formulated in models, but other  
82 radiatively active aerosols have also been considered such as calcium carbonate or alumina (Angel, 2006,  
83 Cummings et al., 2017). The injection strategy may be global or designed to affect particular regions  
84 such as the Arctic (e.g. Robock et al., 2009), or designed to maintain particular useful constraints such

85 as pole-equator temperature gradients (MacMartin and Kravitz, 2016).”

86

87

88 The most interesting results and what I would think is the main results of this study, the differences

89 between the different ESM are not really discussed and readers are left with more questions than answers.

90 Looking at figures 4 and 5 there are many interesting things going on, but very little discussion and even

91 misleading text, not presenting the results (for example line 145, see comment below). Why is there so

92 big difference between the ESM when the impact of the SAI is observed? Comparing the volume and

93 area evolution for BNU-ESM and HadGEM2-ES it appears that the volume loss is reduced in the G4

94 simulations, but the reduction happens later in the BNU-ESM, the G4 line follows the RCP4.5 until about

95 2060, but the G4 line is off from RCP4.5 already in 2040 for HadGEM2-ES, why is this difference?

96 The ice cap volume trend is largely determined by the SMB variability that forced PISM. We added

97 an SMB figure in the main text, and a scatterplot between annual SMB and volume loss rate in the

98 supplementary to show how temporal SMB changes in simulation scenarios that can explain the

99 volume different behavior presented by ESM.

100

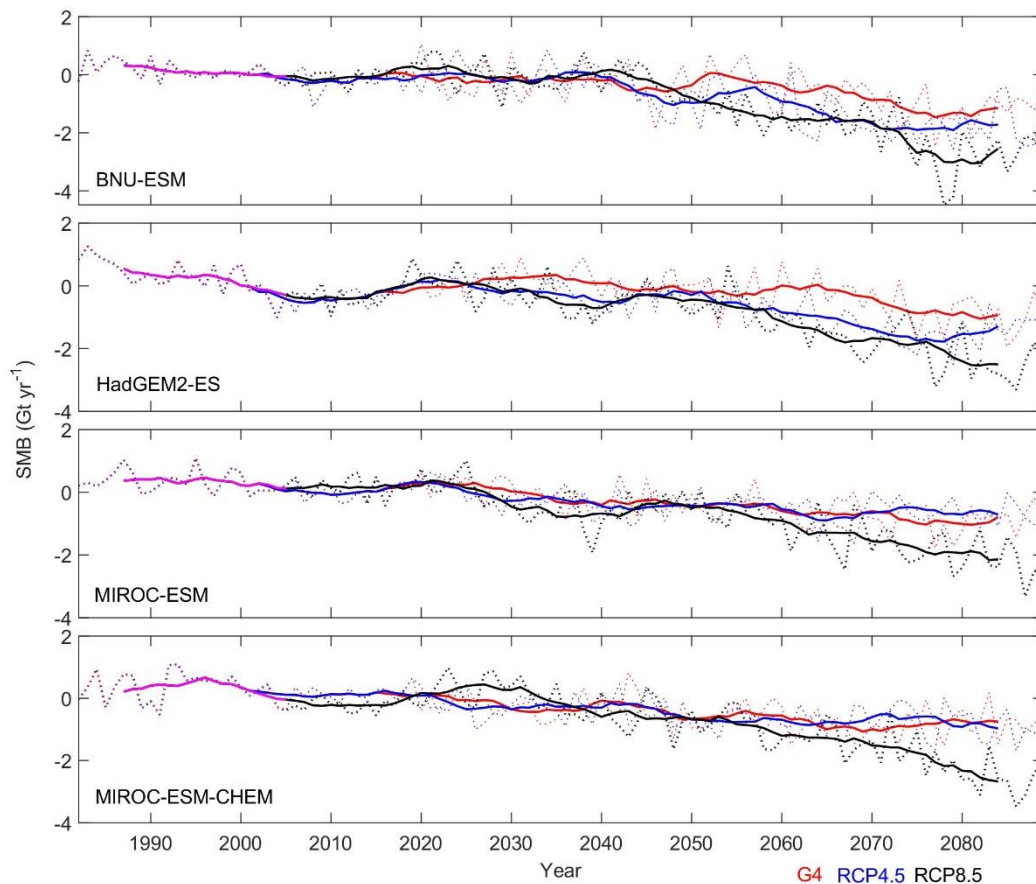

101 **Figure 2** Time series of annual (dotted curves) and decadal (solid curves) SMB during 1982–2089 under

102 historical, G4 (red), RCP4.5 (blue) and RCP8.5 (black) modelled by SEMIC driven by downscaled and

103 bias-corrected climate forcings from BNU-ESM, HadGEM2-ES, MIROC-ESM and MIROC-ESM-

104 CHEM, assuming a constant ice area for all simulations.

105

106

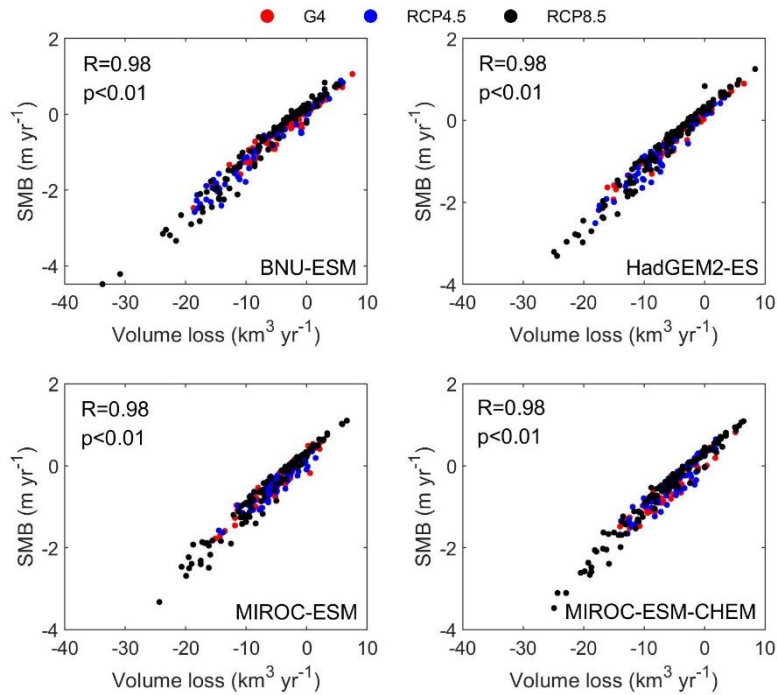

107

108 **Figure S1.** Scatterplot of annual SMB and volume loss rate over Vatnajökull ice cap under G4 (red),  
 109 RCP4.5 (blue) and RCP8.5 (black) during 1982–2089 by BNU-ESM, HadGEM2-ES, MIROC-ESM and  
 110 MIROC-ESM-CHEM.

111

112 Why is there so big difference between the ESM when the impact of the SAI is observed? Comparing  
 113 the volume and area evolution for BNU-ESM and HadGEM2-ES it appears that the volume loss is  
 114 reduced in the G4 simulations, but the reduction happens later in the BNU-ESM, the G4 line follows the  
 115 RCP4.5 until about 2060, but the G4 line is off from RCP4.5 already in 2040 for HadGEM2-ES, why is  
 116 this difference?

117 There are relatively small differences in SMB between RCP4.5 and G4. Each model has a single  
 118 realization of each scenario. Therefore, differences between scenarios become noticeable by eye at  
 119 different periods due to the variability of SMB and climate forcing over time. We added explanation in  
 120 Section 3 to answer:

121 “Furthermore, there are small differences in the appearance of divergences between scenarios for each  
 122 of the models, this is because there are random variations in weather and SMB forcing (Fig. 2). For  
 123 example, the small differences in SMB between the G4 and RCP4.5 manifests itself in HadGEM2-ESM  
 124 about 20 years earlier than BNU-ESM”

125

126 For the MIROC runs the G4 lines (volume and area) follow the RCP4.5 lines. I think therefore that the  
 127 numbers given in the abstract that G4 reduces mass loss from 16% to 12% misleading, as there is so big  
 128 difference depending on which ESM is applied. The ensemble means and the numbers in the abstract  
 129 are really showing the value in between the little MIROC response and the much larger HadGEM2-ES  
 130 response to the SAI. Why are there such big differences in the responses?

131 We revised abstract as your suggestion. The differences are due to the SMB forcing differences between  
 132 models (see earlier plots), with MIROC differences between RCP4.5 and G4 being very small. We  
 133 changed to:

134 “By 2089, G4 reduces VIC mass loss from 16 % under RCP4.5 to 12 % though with relatively large

135 across-ESM spread. The SAI mitigating impacts are largely determined by SMB, with BNU-ESM and  
136 HadGEM2-ES having much larger changes than the two MIROC models.”

137

138 Also, very interesting is the area curves for the MIROC-ESM-CHEM results, the RCP8.5 reduces the  
139 area much slower than the RCP4.5 and G4 until about 2040 when it speeds up and overtakes in ca 2070  
140 and the area and volume loss is larger than for the RCP4.5 and G4 runs. Similar, but smaller effect is also  
141 visible in the BNU-ESM results, the area (and volume) loss of RCP8.5 is slower in the first decades of  
142 the simulations but then speeds up and overtakes the RCP4.5 and G4 losses. The difference between the  
143 RCP4.5 and RCP8.5 volume and area loss is larger at 2089 in the MIROC runs than in the BNU-ESM  
144 and HadGEM2-ES, what causes this difference?

145 We answer your question in the Section 3, we added:

146 “Area loss rates under RCP8.5 are smaller than RCP4.5 and G4 prior 2040 with BNU-ESM and MIROC-  
147 ESM-CHEM, but later, loss rates under RCP8.5 accelerate eventually having larger area loss than  
148 RCP4.5 after 2080 for BNU-ESM and after 2075 for MIROC-ESM-CHEM. The main reason is again  
149 due to SMB, and is fundamentally due by the slightly lower VIC near-surface air temperature under  
150 RCP8.5 before 2035. Despite RCP8.5 being a high emissions scenario, the differences in radiative  
151 forcing between scenarios are smaller than random climate variability in the first few decades of the 21<sup>st</sup>  
152 century. Beyond the 2050s, the higher temperatures, surface downward longwave radiation fluxes as well  
153 as lower snowfall in RCP8.5 (Yue et al., 2021) become more significantly different from other scenarios.  
154 By 2089, the volume and area differences between RCP4.5 and RCP8.5 are larger in the MIROC runs  
155 than in the BNU-ESM and HadGEM2-ES. This is clearly due to mean SMB differences (RCP8.5-RCP4.5)  
156 during 2006–2089: -0.20, -0.25, -0.42, -0.40 m yr<sup>-1</sup> for BNU-ESM, HadGEM2-ES, MIROC-ESM and  
157 MIROC-ESM-CHEM, respectively (Fig. 2).”

158

159 I think the ensemble mean, shown in the figures furthest to the right is misleading and does not give  
160 much information (as the numbers given in the abstract) what is interesting, and I find missing discussion  
161 of in the paper is the variable responses of the simulations forced with the different ESM.

162 We wanted to avoid talking about stochastic variability “weather” rather than actual significant  
163 differences due to scenario. There is always large across-model spread for ESM. This is why the  
164 ensemble mean is so popular, e.g. in IPCC reports. However, we revised Section 3, to describe more  
165 results presented for individual ESM, avoiding the misleading by ensemble mean. We define  
166 uncertainties in this study as the ensemble mean and 95% confidence interval, N=4. We added:

167 “G4 reduces the VIC volume and area by 4±4 % and 2±3 % relative to RCP4.5. The relatively large  
168 spread demonstrates the different SAI impacts across each ESM, e.g., G4 reduces the VIC volume 7–8 %  
169 relative to RCP4.5 with BNU-ESM and HadGEM2-ES forcing, but the two MIROC models predict little  
170 differences. These are mainly determined by SMB in these scenarios, G4 reduces SMB by 0.25 m yr<sup>-1</sup>  
171 and 0.41 m yr<sup>-1</sup> during 2020–2069 in BNU-ESM and HadGEM2-ES, but less than 0.11 m yr<sup>-1</sup> in the two  
172 MIROC models (Fig. 2).”

173

174 There is no explanation of what impact G4 has on precipitation, temperature, or circulation in the model,  
175 that would be interesting, could this be added to the discussion?

176 Done. We added:

177 “In G4, changes in Atlantic Ocean circulation may increase VIC temperatures. Projections by all ESM  
178 with data show AMOC index at 30°N is 0–4 Sv stronger in G4 than RCP4.5 (Fig. 9a), which acts to

179 increase heat flux from ocean to atmosphere near Iceland (Fig. 9d). However, the atmospheric cooling  
180 associated with G4 SAI dominates the VIC climate, resulting in a 0.4°C reduction of air temperature and  
181 a 6% lower surface melt-runoff under G4. There are across model differences, with the two MIROC  
182 projecting little changes between G4 and RCP4.5 in temperatures and precipitation, and hence the  
183 response of ice cap volume. Precipitation is the main component of mass accumulation, all ESM project  
184 insignificant precipitation differences between G4 and RCP4.5. This is different from the global (Trisos  
185 et al., 2018) and Greenland (Moore et al., 2019) cases where G4 reduces precipitation in most regions,  
186 due to the fundamental difference between long wave greenhouse gas and shortwave SAI radiative  
187 forcing. Greenhouse gases are distributed throughout the atmosphere, while shortwave radiation impacts  
188 surface temperatures, hence temperature lapse rates are altered under SAI and the atmosphere is drier  
189 than it would be for the same temperature under simple greenhouse gas climates. The changes  
190 precipitation under G4 that are seen in VIC may be driven by the relatively enhanced AMOC and lower  
191 Arctic sea ice (Xie et al., 2022) which in turn brings more water vapor to VIC.”

192 ”

193

194 The periods of the study are not consistently written through paper and it is confusing, in line 16 and 80  
195 the period is stated 1982-2089, in line 61 2006-2089, line 96 period is 1982-1999 and in line 103 it is  
196 1982-2005. In line 184 the 2089 is subtracted from 2020, is that present day reference (not 1999, or  
197 2005/6?) My suggestion would be to have the periods, reference consistent through the paper.

198 Sorry, we can't use a common reference period, it's better to follow the CMIP5 scenario period definition  
199 that 2005 is the line between the historical and future. As for 1982–1999 which is the spin-up period  
200 followed by Schmidt et al. (2020) because VIC was close to steady state during that period. G4 is  
201 designed in 2020-2089, but the aerosol injection only over 2020-2069, so, we compare both periods. We  
202 revised descriptions in Section Introduction to make it clearer:

203 “We simulate the response of the VIC with the Parallel Ice Sheet Model (PISM; version 1.0) driven by  
204 monthly SMB from 1982–2089 under CMIP5 historical (1982–2005), RCP4.5 (2006–2089), RCP8.5  
205 (2006–2089) and SAI G4 (2020–2089) scenarios. The SMB fields are modelled by a surface energy and  
206 mass balance model (Section 2.1 and 2.3) driven by downscaled and bias-corrected climate forcings by  
207 all Earth System Model (ESM; Table 1) that have sufficient data fields available from both RCP and G4  
208 scenarios. RCP4.5 (Thomson et al., 2011) is a stabilization scenario with emissions similar to those  
209 agreed under the Paris 2015 agreement (Kitous and Keramidis, 2015), while RCP8.5 (Riahi et al., 2011)  
210 is a “business-as-usual” scenario that is a likely outcome if we do not make any efforts to reduce the  
211 greenhouse gas emissions. By the end of the 21<sup>st</sup> century, their total radiative forcing is stabilized at  
212 roughly 4.5 and 8.5 W m<sup>-2</sup>, and with global mean surface temperature rise by 1.8 and 3.7 °C relative to  
213 1986–2005 (IPCC, 2014). The SAI G4 scenario branches off the RCP4.5 scenario in 2020, specifying 5  
214 Tg yr<sup>-1</sup> of SO<sub>2</sub> to be injected into the equatorial lower stratosphere until 2069, and then continues with  
215 RCP4.5 forcing to 2089 (Kravitz et al., 2013). We quantitatively evaluate the SAI G4 impact by analyzing  
216 differences of the VIC geometry between 2020 and 2069, as well as the whole simulation period between  
217 1982 and 2089.”

218

219 Also, the period of the forcing is not consistent, in line 60 and 91 it is monthly, but in line 91 it is daily  
220 are both daily and monthly forcing used?

221 No, PISM is only driven by monthly SMB, which are from daily SMB modelled by SEMIC. We corrected  
222 the error:

223 “To initialize PISM over the VIC, we need the boundary conditions of the surface elevation, bedrock  
224 altitude, upward geothermal flux, ice temperature, and monthly surface mass balance (Table 1, Fig. 1,  
225 Fig. 2).”

226

227 The description of the mass balance model is also not consistent and confusing, in line 79 SEMIC is  
228 introduced, but in line 82 it is stated that ESM is statistically downscaled and bias corrected using ISI-  
229 MIP, in line 97 it is stated that the spin-up is driven by SMB fields from PSIM forced with a sequence of  
230 ESM (no SEMIC or downscaling used?) in line 109 it is stated that SMB are corrected and SEMIC  
231 modelled and in line 117 it is stated that T, long wave and short wave radiation that drive SMB (SEMIC?)  
232 are bias-corrected (how?) with ERA5 reanalysis. My suggestion would be to straighten the description  
233 of what is done up and be consistent throughout the paper.

234 Climate fields from ESM are downscaled and bias-corrected to  $0.025^\circ$ , and then these fields are used to  
235 calculate SMB by SEMIC, so the SMB resolution is also  $0.025^\circ$ , we use the  $0.025^\circ$  SMB to run PISM.  
236 We added a Section 2.3 ‘SMB modelling’ to describe how we downscale the ESM output and how we  
237 estimate SMB by SEMIC model:

238 "In this study, the SMB fields used to drive PISM are from Yue et al. (2021), and estimated by SEMIC  
239 under the historical, G4, RCP4.5 and RCP8.5 scenarios during 1982–2089. SEMIC in turn is driven by  
240 downscaled and bias-corrected ESM data including temperatures, windspeeds, pressures, humidities and  
241 radiative forcing terms. We use all CMIP5 and GeoMIP ESM that have complete data fields available,  
242 namely BNU-ESM, HadGEM2-ES, MIROC-ESM, and MIROC-ESM-CHEM (Table 1). We statistically  
243 downscaled the ESM forcing based on the ERA5 reanalysis dataset (Hersbach et al., 2020). The point of  
244 the bias correction is to ensure the mean state of the model parameters matches observations. The separate  
245 model trends within each ESM over the observational period remain the same. Thus, the bias correction  
246 ensures that models begin close to an observed state, but can then diverge as the separate model climate  
247 dictate. The spatial resolution of ERA5 is about 30 km, but still cannot capture the VIC topography. To  
248 address this, we first downscaled ERA5 climate to  $0.025^\circ \times 0.025^\circ$  grid based on their correlation with  
249 VIC surface elevation. We find surface elevation is well correlated with near-surface temperature  
250 ( $R=0.83$ ,  $p<0.01$ ), downward longwave ( $R=0.77$ ,  $p<0.01$ ) and shortwave radiation ( $R=0.74$ ,  $p<0.01$ ) and  
251 specific humidity ( $R=0.77$ ,  $p<0.01$ ), with lapse rates of  $-5.4^\circ\text{C km}^{-1}$ ,  $-11.9\text{ W m}^{-2}\text{ km}^{-1}$ ,  $15.85\text{ W m}^{-2}\text{ km}^{-1}$   
252 and  $-0.59\text{ k k}^{-1}\text{ km}^{-1}$ , respectively. Precipitation and snowfall are downscaled following De Ruyter-de  
253 Wildt et al. (2004). The former is downscaled using Kriging interpolation method, with its empirically  
254 exponential relationship with observed surface elevation. The latter is assumed equal to precipitation rate  
255 when the daily mean air temperature is below  $3^\circ\text{C}$ , otherwise no snowfall occurs. Other SEMIC driven  
256 fields (surface wind speed, air density, pressure) are simply bilinearly interpolated due to the relatively  
257 minor effects on SMB in SEMIC. Then, we use the downscaled  $0.025^\circ \times 0.025^\circ$  forcing fields as the  
258 observational reference climate to downscale and bias-correct the ESM fields using the ISIMIP approach  
259 (Hempel et al., 2013). The ISIMIP is a trend-preserving approach so that the long-term climate trends in  
260 models are preserved, while the mean at each grid cell is matched to observations. There are two  
261 fundamentally different ways ISIMIP can do the correction: addition and multiplication, and we follow  
262 ISIMIP protocol in deciding which method to use for each meteorological field variable (Hempel et al.  
263 2013). The additive approach is used for most fields preserving, e.g. the absolute changes of the monthly  
264 temperature; while the multiplicative method is used for preserving the relative changes for precipitation  
265 and radiation. Finally, these  $0.025^\circ \times 0.025^\circ$  fields were used to drive the SEMIC model. We also bias-  
266 corrected VIC surface albedo and considered SMB-elevation feedback in all simulations (Yue et al.,

267 2021). Over the whole VIC, modelled SMB over the period 1991–2010 (Fig. 1d, Fig. 2) is well correlated  
268 ( $R=0.6$ ,  $p<0.05$ ) with an interpolated map from 60 measurement sites (Björnsson et al., 2013), although  
269 the mean is overestimated by  $0.61 \text{ m yr}^{-1}$ ."

270

271 The whole section 4 reflects little or limited understanding of dynamics of ice caps and how the system  
272 responds to climate. See comments below. Ice cap in balance state loses mass at the edges and gains in  
273 the centre and the ice flow redistributes these to maintain the size and shape of equilibrated ice cap. The  
274 discussion in section 4 is strangely worded in many places and my suggestion would be to rewrite the  
275 whole section to better include known dynamics of ice caps and effect of SMB.

276 We revised the Section 4. See revisions below your every comment. We naturally disagree that we have  
277 little understanding of ice dynamics, and instead suggest that the difficulties were with inadequate  
278 explanations. The authors include experienced ice dynamics modelers with a proven track record  
279 published research, for example modelling VIC with PISM (Schmidt, et al 2020 *J. Glaciol.*,  
280 doi:10.1017/jog.2019.90); using higher order models in Greenland drainage basins (Guo, et al 2019, *The*  
281 *Cryosphere*, <https://doi.org/10.5194/tc-13-3139-2019>); using full Stokes model for Antarctica ice domes  
282 (Zhao, et al. 2018 *The Cryosphere*, doi:10.5194/tc-12-1651-2018) and small glaciers in Asia (Zhao, et al.  
283 2013 *J. Glaciology*, doi: 10.3189/2014JoG13J126; Zhao, et al. 2022, *Water*,  
284 <https://doi.org/10.3390/w14020271>); developing and using combined ice dynamic and basal hydrology  
285 models (Wolovick, et al 2021a *JGR* <https://doi.org/10.1029/2020JF005937>; Wolovick, et al, 202b1 *JGR*  
286 <https://doi.org/10.1029/2020JF005936>).

287

288 The Discussion section is confusing and has many unclear statements that don't make sense in the context  
289 of the presented study (see comments below) suggest reworking and clarifying and perhaps discussing  
290 the physical impacts of G4 on precipitation, temperature and why there is such a big difference between  
291 the 4 ESM.

292 Sorry about that, we have endeavored to address specific comments and looked at the section again. We  
293 added impacts of G4 on precipitation and temperature:

294 "In G4, changes in Atlantic Ocean circulation may increase VIC temperatures. Projections by all ESM  
295 with data show AMOC index at  $30^{\circ}\text{N}$  is  $0\text{--}4 \text{ Sv}$  stronger in G4 than RCP4.5 (Fig. 9a), which acts to  
296 increase heat flux from ocean to atmosphere near Iceland (Fig. 9d). However, the atmospheric cooling  
297 associated with G4 SAI dominates the VIC climate, resulting in a  $0.4^{\circ}\text{C}$  reduction of air temperature and  
298 a 6 % lower surface melt-runoff under G4. There are across model differences, with the two MIROC  
299 projecting little changes between G4 and RCP4.5 in temperatures and precipitation, and hence the  
300 response of ice cap volume. Precipitation is the main component of mass accumulation, all ESM project  
301 insignificant precipitation differences between G4 and RCP4.5. This is different from the global (Trisos  
302 et al., 2018) and Greenland (Moore et al., 2019) cases where G4 reduces precipitation in most regions,  
303 due to the fundamental difference between long wave greenhouse gas and shortwave SAI radiative  
304 forcing. Greenhouse gases are distributed throughout the atmosphere, while short wave radiation impacts  
305 surface temperatures, hence temperature lapse rates are altered under SAI and the atmosphere is drier  
306 than it would be for the same temperature under simple greenhouse gas climates. The changes  
307 precipitation under G4 that are seen in VIC may be driven by the relatively enhanced AMOC and lower  
308 Arctic sea ice (Xie et al., 2022) which in turn brings more water vapor to VIC."

309 Regarding differences between ESM – these 4 ESM are within the typical range of equilibrium climate  
310 sensitivity (i.e. the global mean surface air temperature change caused by a doubling of the atmospheric



311 CO<sub>2</sub> with the BNU-ESM, HadGEM2-ES and MIROC models {3.92, 4.61, 4.67} K) exhibited by CMIP5  
312 models. There is a range of climate responses, and when small regions such as Iceland are the focus, the  
313 differences between ESM are naturally larger than when averaged over the globe or larger regions, simply  
314 by the central limit theorem.

315

316 In figure 8 results from 8 ESM are presented, why are not all 8 used in the analysis before? The  
317 correlation between AMOC and SMB is shown, but there is no discussion of how this correlation might  
318 come about, there is no direct link, so some physical explanation of the relationship is missing.

319 Because for SMB modelling, SEMIC needs 8 daily climate fields to estimate SMB, and there are only 4  
320 ESM with all the data available in both G4 and RCP scenarios. We use every possible model. For the  
321 AMOC, we use all 8 ESM that have done G4, and which is consistent with the GrIS mass balance data  
322 from Goelzer et al. (2021). In Section 2.3 SMB modelling, we added:

323 “In this study, the SMB fields used to drive PISM are from Yue et al. (2021), and estimated by SEMIC  
324 under the historical, G4, RCP4.5 and RCP8.5 scenarios during 1982–2089. SEMIC in turn is driven by  
325 downscaled and bias-corrected ESM data including temperatures, windspeeds, pressures, humidities and  
326 radiative forcing terms. We use all CMIP5 and GeoMIP ESM that have complete data fields available,  
327 namely BNU-ESM, HadGEM2-ES, MIROC-ESM, and MIROC-ESM-CHEM (Table 1).”

328

329

## 330 Technical comments

### 331 Abstract

332 Line 11-14 the first two sentence of the abstract are speculative and not useful as an entry for a paper that  
333 has title “Insensitivity of mass loss ....” Suggest to state the findings of the study in the abstract to entice  
334 readers, not start with a speculative sentence: “SAI may reduce the mass loss by slowing surface  
335 temperature rise” does it, or does it not? (see comment above on title of the paper). The second sentence  
336 does not make sense: “although SMB is affected by the local climate, the sea level contribution is also  
337 dependent on ice dynamics” – this connection Although .... Also ... is strange, the sentence needs  
338 restructuring.

339

340 We rewrote the abstract as follows:

341 **Abstract.** Geengineering by stratospheric aerosol injection (SAI) impacts the North Atlantic region  
342 differently from the rest of the world, because in climate models it reverses the slow-down in the Atlantic  
343 Meridional Circulation (AMOC) driven by greenhouse gas warming. AMOC delivers significant heat to  
344 Iceland, and hence plays an important role in determining mass loss from the Vatnajökull ice cap (VIC).  
345 We use the Parallel Ice Sheet Model (PISM) to estimate the VIC mass balance under the CMIP5 (Coupled  
346 Model Intercomparison Project Phase 5) RCP4.5, RCP8.5 and GeoMIP (Geoengineering Model  
347 Intercomparison Project) G4 SAI scenarios during the period 1982–2089, driven by statistically  
348 downscaled climate forcings from four Earth System Models (ESM). The G4 scenario follows the  
349 greenhouse gas emissions trajectory specified by RCP4.5, but with additional 5 Tg yr<sup>-1</sup> of SO<sub>2</sub> injection  
350 to the lower stratosphere. By 2089, G4 reduces VIC mass loss from 16 % under RCP4.5 to 12 % though  
351 with relatively large across-ESM spread. The SAI mitigating impacts are largely determined by SMB,  
352 with BNU-ESM and HadGEM2-ES having much larger changes than the two MIROC models. All ESM  
353 show that the non-SMB component (i.e., ice dynamics and basal melting) remains nearly constant at  
354 around -0.25 m yr<sup>-1</sup> and is remarkably insensitive to climate forcing over time for all scenarios. This non-  
355 SMB component is important for ice cap loss rates compared with mass balances of -0.47, -0.61 and -  
356 0.88 m yr<sup>-1</sup> over the 1982–2089 period under G4, RCP4.5 and RCP8.5, respectively. The unusually stable  
357 dynamic losses are consistent with the much higher geothermal heat flows under parts of the ice cap than  
358 in most glaciers elsewhere.

359

360 Line 17-19 this sentence is unclear, suggest to edit: “Ice dynamics are important for the ice cap loss  
361 rates ... but making no difference to mass loss difference under the scenario”

362 We corrected:

363 “All ESM show that the non-SMB component (i.e., ice dynamics and basal melting) remain nearly  
364 constant at around -0.25 m yr<sup>-1</sup>, and is remarkably insensitive to climate forcing over time for all scenarios.  
365 This non-SMB component is important for ice cap loss rates compared with mass balances of -0.47, -  
366 0.61 and -0.88 m yr<sup>-1</sup> over the 1982–2089 under G4, RCP4.5 and RCP8.5, respectively.”

367

368 Line 19-20 The following sentence does not make sense either and is not really supported by the material  
369 in the paper and conclusions: ... “dynamics are remarkably insensitive to climate forcing “dynamics of  
370 ice caps are forced by geometry (slope, thickness) and rheology (ice viscosity) and therefore strange to

371 [relate to climate forcing](#)  
372 We disagree, it is not strange that climate forcing affects ice dynamics. Climate forcing affects ice  
373 dynamics in several ways, of relevance here is it increases ablation around the edge of the ice cap, in  
374 most glaciers high altitude snowfall either is pretty constant or increases in greenhouse gas scenarios,  
375 leading to steeping of the ice. In the case of the Greenland and Antarctic ice sheets, grounding line retreat  
376 leads to dynamic changes that depends on ocean thermal forcing that depends on climate scenario. On  
377 longer timescales climate warming likely warms the ice, in the case of cold glaciers, or changes the  
378 quantity of water within the ice, both of which changes its viscosity.  
379 “All ESM show that the non-SMB component (i.e., ice dynamics and basal melting) remain nearly  
380 constant at around  $-0.25 \text{ m yr}^{-1}$ , and is remarkably insensitive to climate forcing over time for all  
381 scenarios.”  
382  
383 Or because “AMOC compensation to SMB and low rates of iceberg calving” suggest to rewrite this  
384 sentences. Also, the “AMOC compensation to SMB” is not shown in the paper and calving is not really  
385 discussed either, suggest to either delete or rewrite these statements.  
386 Ok, we deleted this sentence.  
387  
388 Line 21-22 this statement may be true, but is not supported by material in the paper, also the sentence  
389 reads strangely, suggest to edit and clarify and make a section in paper to support this statement.  
390 OK, we deleted this sentence.  
391

## 392 **1 Introduction**

393 Line 26 “the unique climate” is strange here, every location on Earth really has unique climate, right?  
394 [Suggest to edit sentence](#)  
395 Deleted “unique”, and replaced with: “the unusual and particular climate of Iceland”  
396  
397 [Line 29 edit something strange here “which since”](#)  
398 We deleted which.  
399  
400 [Line 29 is there a reference supporting this statement?](#)  
401 Added: Oerlemans, J. (1992). Climate sensitivity of glaciers in southern Norway: Application of an  
402 energy-balance model to Nigardsbreen, Hellstugubreen and Alftobreen. *Journal of Glaciology*, 38(129),  
403 223-232. Doi:10.3189/S0022143000003634; Rupper, S., & Roe, G. (2008). Glacier Changes and  
404 Regional Climate: A Mass and Energy Balance Approach, *Journal of Climate*, 21(20), 5384-5401  
405  
406 [Line 30 strange sentence, suggest to edit, glaciers in Iceland are very sensitive to changes in forcing and](#)  
407 [experience high mass throughput, Vatnajökull, the subject of this paper is however very large and is](#)  
408 [losing mass at slower rate than the neighboring Hofsjökull and Langjökull](#)  
409 We removed our previous sentence, and followed your edit:  
410 “Glaciers in Iceland are very sensitive to changes in forcing and experience high mass throughput, since  
411 maritime glaciers are more sensitive to climate variations than continental ones (Oerlemans, 1992).  
412 Vatnajökull ice cap, the subject of this paper, is however very large and is losing mass at slower rate than

413 the neighboring Hofsjökull and Langjökull ice cap (Björnsson et al., 2002, Jóhannesson et al., 2006).”  
414  
415 Line 31, suggest to delete “expected to accelerate” this is not shown in the references  
416 Done.  
417  
418 Line 34 suggest to edit, strange sentence “obvious and deeply moving for Icelanders” what does that  
419 mean?  
420 It means that many Icelanders that we have spoken and worked with enjoy and identify with their land  
421 having glaciers. In other parts of the world, loss of ice cover has had exactly the impact queried here e.g.  
422 in artistic interpretation and emotional attachment to the landscape (Orlove, B., E. Wiegandt and B. H.  
423 Luckman (eds.) 2008. Darkening Peaks. Glacier Retreat, Science, and Society. Berkeley and Los Angeles:  
424 University of California Press). That might be expected of Icelanders as well. But since this impact is not  
425 particularly relevant here we delete that, and revised to:  
426 “Although their contribution to global mean sea-level rise would be just 1 cm, even if all the ice melted  
427 (Björnsson and Pálsson, 2008), the local impacts of rapid glacier loss will be obvious and will cause  
428 profound changes in hydrology (Flowers et al., 2003).”  
429  
430 Line 37 more recent references, such as Aðalgeirsdóttir et al., 2020, Wouters et al., 2019 and Hugonnet  
431 et al., 2021 show that the mass loss rate has been slightly reduced after 2010 so this sentence should be  
432 edited.  
433 Ok, done, but we do not sure which article Wouters et al., 2019 refers to, we revised to:  
434 “Surface mass balance (SMB, the sum of accumulation and ablation) significantly decreased from a  
435 slightly positive balance in the 1980s to  $-0.8 \text{ m yr}^{-1}$  during 1995-2014 (Pálsson et al., 2017), but mass  
436 loss rate slightly reduced after 2010 (Aðalgeirsdóttir et al., 2020, Hugonnet et al., 2021).”  
437  
438 Line 42-43 limiting global warming to less than  $2^{\circ}\text{C}$  is not an IPCC target, but the Paris agreement, IPCC  
439 is not prescriptive  
440 Ok, done.  
441  
442 Line 45 what does “relatively cheap way” mean here? Suggest to edit  
443 It’s the financially cost for the implementation of SAI. We revised to:  
444 “Moreover, deployment of SAI may be a financially cheap way to offset temperature rises on the global  
445 scale (Smith and Wagner, 2018).”  
446  
447 Line 49 Vatnajökull is not in direct contact with the ocean (an outlet of Vatnajökull, Breiðamerkurjökull  
448 is calving into a lagoon that is connected with the ocean through a short river). Suggest to edit this  
449 sentence, calving and basal melt are not driven by changing climate or warming ocean  
450 Thanks for your explanation. We deleted this sentence “that are driven by changing climate or impacts  
451 due to the warming ocean in contact with the ice” and revised to:  
452 “However, Yue et al. (2021) did not consider non-surface mass balance generated by changes in ice flow  
453 and discharge (e.g., calving of ice and basal melting).”  
454  
455 Line 50, suggest to delete “It is this component that we tackle here” see comment above  
456 Done.

457

458 Line 51-53 this is very strange sentences, suggest to edit. The atypical behaviour of the North Atlantic is  
459 not discussed in this paper and neither is the compensatory effect of the climate forcing on the AMOC,  
460 suggest to either delete or explain better.

461

462 Rewritten as :

463 “here we focus only on impacts from SAI on the mass balance of a single ice cap in Iceland. The topic  
464 is of wider interest because the behaviour of the North Atlantic under both climate models driven by  
465 greenhouse gases, and observational evidence points to a slow-down in AMOC, leading to a much-  
466 reduced rate of warming in the North Atlantic relative to the rest of world (Cheng et al., 2013). Under  
467 SAI, AMOC slows less than under greenhouse gas climates (Hong et al., 2017; Yue et al., 2021; Xie et  
468 al., 2022). Thus, in Iceland, we would expect SAI changes on AMOC and radiative forcing to have  
469 compensatory effects to the ice cap. Furthermore, the Arctic warmed 6 times faster than the global mean  
470 from 1998-2012 (Huang et al., 2017), leading to concerns on the stability of the Arctic cryosphere, and  
471 examination of possible roles for geoengineering methods in its preservation (Lee et al., 2021). Whether  
472 SAI might even lead to exacerbated ice mass loss in the North Atlantic is an important question that goes  
473 to the fundamental reason for ever doing SAI – that is does SAI better preserve the important elements  
474 of the current climate system than plausible greenhouse gas emissions scenarios?”

475

476 Line 55, is there a reference for this statement (warming at least twice as fast as the global mean)?

477 Done.

478 “Furthermore, the Arctic is warmed 6 times faster than the global mean from 1998-2012, (Huang, J. et  
479 al. Recently amplified arctic warming has contributed to a continual global warming trend. Nat. Clim.  
480 Chang. 7, 875–879 (2017).”

481

482 Line 57 missing “for” in front of “its”?

483 Inserted “in”, not for.

484

485 Line 57-58 not clear, what are “unwelcome impacts from geoengineering”?

486 Unwelcome impacts mean the geoengineering may fail in this region due to the Arctic amplification and  
487 the impact of enhanced AMOC under geoengineering. See reply of Line 51-53.

488

489 Lines 62-64, the descriptions of the two scenarios (“close to future emissions under the 2015 Paris  
490 agreement” and “extreme failure to mitigate scenario”) are strange, suggest to use some other descriptor,  
491 like temperature by 2100 to describe these.

492 It is important from the policy relevance perspective that RCP4.5 is close to the Paris 2015 agreement.

493 But we edited it:

494 “RCP4.5 (Thomson et al., 2011) is a stabilization scenario with emissions similar to those agreed under  
495 the Paris 2015 agreement (Kitous and Keramidas, 2015), while RCP8.5 (Riahi et al., 2011) is a “business-  
496 as-usual” scenario that is a likely outcome if we do not make any efforts to reduce the greenhouse gas  
497 emissions. By the end of the 21<sup>st</sup> century, their total radiative forcing is stabilized at roughly 4.5 and 8.5  
498 W m<sup>-2</sup>, and with global mean surface temperature rise by 1.8 and 3.7 °C relative to 1986–2005 (IPCC,  
499 2014).”

## 500 **2 Model and validation**

501 Line 66 Model and Verification, suggest to replace with “Validation”, the convention is to use Verification  
502 for check if code is solving the equations right, but validate to compare to observations

503 Yes, thanks. Done

504

505 Line 73, delete s in schemeS, suggest to replace “ice flow” with “constitutive equation”

506 Done.

507

508 Line 75, something is missing “Eigen scheme” does not make sense. Suggest to refer to PISM manual  
509 or website

510 We gave a description for “Eigen scheme”. We added:

511 “—Ice front calving rate  $c$  is calculated by the strain rate Eigenvalue scheme (Levermann et al., 2012):

$$512 \quad c = K \cdot \max(0, \epsilon_{\parallel}) \cdot \max(0, \epsilon_{\perp}) \quad (5)$$

513 Where  $K$  is a constant that explains the ice properties relevant to calving,  $\epsilon_{\parallel}$  and  $\epsilon_{\perp}$  denote the strain  
514 rate along and transversal to horizontal ice flow, respectively.

515 We also added some brief descriptions about PISM model and parameterizations we used:

516 The PISM model (version 1.0; Bueler and Brown (2009); <https://www.pism.io>) is an open-source ice  
517 sheet thermo-dynamic model that has been used in numerous studies of a wide range of ice sheets and  
518 glaciers (e.g., Aschwanden et al., 2019; Yan et al., 2020). The evolution of the ice cap surface elevation  
519  $H$  is calculated by mass continuity equation:

$$520 \quad \frac{dH}{dt} = M - \nabla \cdot \vec{Q} - M_b \quad (2)$$

521 Where  $t$  is the time step,  $M$  is the mass balance,  $M_b$  is the basal melt rate,  $\nabla \cdot \vec{Q}$  is the ice flux calculated  
522 by stress balance model. PISM model provides several parameterizations to describe the ice stress  
523 balance, ice flow, basal sliding and ice calving (details see PISM manual; <https://www.pism.io/docs/>).  
524 The choices of parameterizations and free parameters followed Schmidt et al. (2020), and validated the  
525 simulations using observations over Vatnajökull. In brief the parameterizations we used in this study are::

526

527 —We use hybrid stress balance model (Bueler and Brown, 2009) with both Shallow Ice Approximation  
528 (SIA; Hutter, 1983) and Shallow Shelf Approximation (SSA; Morland, 1987) to solve ice vertical  
529 deformation and longitudinal stretching, allowing simulation of both slowly flowing ice cap interiors and  
530 fast flowing outlet glaciers.

531

532 —Ice rheology is parameterized by Glen’s flow law (Glen, 1955):

$$533 \quad \tau = 2\eta D, \quad (3)$$

534 where  $\tau$  is the deviatoric stress tensor,  $D$  is the strain rate tensor, and  $\eta$  is given by:

$$535 \quad \eta = \frac{1}{2} A(T)^{-1/n} d_e^{(1-n)/n}, \quad (4)$$

536 where the parameter  $A$  is strongly dependent on ice temperature,  $d_e$  is the second invariant of the  
537 strain rate tensor, flow exponent  $n$  is commonly taken the value of 3.

538

539 —Ice front calving rate  $c$  is calculated by the strain rate Eigenvalue scheme (Levermann et al., 2012):

540 
$$c = K \cdot \max(0, \epsilon_{\parallel}) \cdot \max(0, \epsilon_{\perp})$$
 (5)

541 Where  $K$  is a constant that explains the ice properties relevant to calving,  $\epsilon_{\parallel}$  and  $\epsilon_{\perp}$  denote the strain  
542 rate along and transversal to horizontal ice flow, respectively.

543

544 —Basal sliding is estimated by pseudo-plastic law (Bueler and Brown, 2009), which estimate the basal  
545 shear stress  $\tau_b$  through the yield stress  $\tau_c$ , basal velocity  $u_b$ , and parameters of velocity threshold  
546  $u_{threshold}$  and power  $q$ :

547 
$$\tau_b = -\tau_c \frac{u_b}{u_{threshold}^q |u_b|^{1-q}}$$
 (6)

548

549

550 Line 76 suggest to edit: “surface and bedrock elevation” or geometry, these two would provide the ice  
551 thickness, so it is redundant to include also ice thickness

552 We corrected:

553 “To initialize PISM over the VIC, we need surface elevation, bedrock altitude, upward geothermal flux,  
554 ice temperature, and monthly surface mass balance (Table 1, Fig. 1, Fig. 2).”

555

556 Line 77, missing d in re-grided what does “these” mean here? From where are these data? Some  
557 reference to essential data for this study is missing. I would suggest to refer to Björnsson and Pálsson,  
558 2020 for the bedrock data : <https://www.cambridge.org/core/journals/annals-of-glaciology/article/radioecho-soundings-on-icelandic-temperate-glaciers-history-of-techniques-and-findings/4B1BDA5F075411D018245B4CEB7E9730> and surface mass balane a reference to Finnur  
559 Pálsson (2017) and maybe Aðalgeirsdóttir et al., where all smb data in Iceland is summarised.

562 The PISM input data is followed by Schmidt et al. (2020), we cited the bedrock data from Björnsson and  
563 Pálsson, 2020 and we made a table to describe these data:

564

**Table 1** A summary input data fields in PISM.

| PISM input fields    | Data source                                                                                                                                                                 | Period                                                                                                                                   | PISM running resolution | Reference                                                                      |
|----------------------|-----------------------------------------------------------------------------------------------------------------------------------------------------------------------------|------------------------------------------------------------------------------------------------------------------------------------------|-------------------------|--------------------------------------------------------------------------------|
| Surface mass balance | SEMIC output driven by downscaled and bias-corrected climate fields from <sup>a</sup> BNU-ESM, <sup>b</sup> HadGEM2-ES, <sup>c</sup> MIROC-ESM, <sup>d</sup> MIROC-ESM-CHEM | 1982–1999, repeated for 2000 years (PISM spin-up)<br>1982–2005 (CMIP5 historical)<br>2006–2089 (RCP4.5, RCP8.5)<br>2020–2089 (GeoMIP G4) | Monthly<br>500 × 500 m  | Yue et al. (2021)                                                              |
| Surface elevation    | Spot5 satellite                                                                                                                                                             | June to September 2010                                                                                                                   | 500 × 500 m             | Berthier and Touin. (2008)<br>Björnsson, (1986); Björnsson and Pálsson. (2020) |
| Bedrock topography   | Radio echo profiles                                                                                                                                                         | 1980                                                                                                                                     | 500 × 500 m             |                                                                                |
| Ice cap thickness    | Surface elevation minus bedrock topography                                                                                                                                  | —                                                                                                                                        | 500 × 500 m             | —                                                                              |
| Upward heat flux     | Assigns typical values                                                                                                                                                      | —                                                                                                                                        | 500 × 500 m             | Flowers et al. (2003);<br>Björnsson. (1988)                                    |
| Ice temperature      | Prescribed 0 °C everywhere                                                                                                                                                  | —                                                                                                                                        | 500 × 500 m             | Schmidt et al. (2020)                                                          |

<sup>a</sup> Ji et al. (2014), <sup>b</sup> Collins et al. (2011), <sup>c,d</sup> Watanabe et al. (2011).

565

566 Line 78, see comment above, is the daily SMB filed used or monthly as stated in line 60?

567 Should be monthly, we have corrected it.

568

569 Line 82-82, what does “lapse rate approach” mean? Do you correct with a temperature lapse rate? What  
570 is the value for the rate?

571 This is a method that downscales 30 km ERA5 climate fields to 0.025 grid, making them has higher resolution that  
572 are capable of capturing the VIC topography, and then as observations in ISI-MIP method to downscale and bias-  
573 correct climate from ESM. The lapse rate is calculated by the linear relationship of surface elevation against each  
574 climate variable in Yue et al. (2021). We added Section “2.3 SMB modelling” to describe how we downscale the  
575 ESM climate fields:

576 “In this study, the SMB fields used to drive PISM are from Yue et al. (2021), and estimated by SEMIC  
577 under the historical, G4, RCP4.5 and RCP8.5 scenarios during 1982–2089. SEMIC in turn is driven by  
578 downscaled and bias-corrected ESM data including temperatures, windspeeds, pressures, humidities and  
579 radiative forcing terms. We use all CMIP5 and GeoMIP ESM that have complete data fields available,  
580 namely BNU-ESM, HadGEM2-ES, MIROC-ESM, and MIROC-ESM-CHEM (Table 1). We statistically  
581 downscaled the ESM forcing based on the ERA5 reanalysis dataset (Hersbach et al., 2020). The point of  
582 the bias correction is to ensure the mean state of the model parameters matches observations. The separate  
583 model trends within each ESM over the observational period remain the same. Thus, the bias correction  
584 ensures that models begin close to an observed state, but can then diverge as the separate model climate  
585 dictate. The spatial resolution of ERA5 is about 30 km, but still cannot capture the VIC topography. To  
586 address this, we first downscaled ERA5 climate to  $0.025^\circ \times 0.025^\circ$  grid based on their correlation with  
587 VIC surface elevation. We find surface elevation is well correlated with near-surface temperature  
588 ( $R=0.83$ ,  $p<0.01$ ), downward longwave ( $R=0.77$ ,  $p<0.01$ ) and shortwave radiation ( $R=0.74$ ,  $p<0.01$ ) and  
589 specific humidity ( $R=0.77$ ,  $p<0.01$ ), with lapse rates of  $-5.4 \text{ }^\circ\text{C km}^{-1}$ ,  $-11.9 \text{ W m}^{-2} \text{ km}^{-1}$ ,  $15.85 \text{ W m}^{-2} \text{ km}^{-1}$   
590 and  $-0.59 \text{ k k}^{-1} \text{ km}^{-1}$ , respectively. Precipitation and snowfall are downscaled following De Ruyter-de  
591 Wildt et al. (2004). The former is downscaled using Kriging interpolation method, with its empirically  
592 exponential relationship with observed surface elevation. The latter is assumed equal to precipitation rate  
593 when the daily mean air temperature is below  $3^\circ\text{C}$ , otherwise no snowfall occurs. Other SEMIC driven  
594 fields (surface wind speed, air density, pressure) are simply bilinearly interpolated due to the relatively  
595 minor effects on SMB in SEMIC. Then, we use the downscaled  $0.025^\circ \times 0.025^\circ$  forcing fields as the  
596 observational reference climate to downscale and bias-correct the ESM fields using the ISIMIP approach  
597 (Hempel et al., 2013). The ISIMIP is a trend-preserving approach so that the long-term climate trends in  
598 models are preserved, while the mean at each grid cell is matched to observations. There are two  
599 fundamentally different ways ISIMIP can do the correction: addition and multiplication, and we follow  
600 ISIMIP protocol in deciding which method to use for each meteorological field variable (Hempel et al.  
601 2013). The additive approach is used for most fields preserving, e.g. the absolute changes of the monthly  
602 temperature; while the multiplicative method is used for preserving the relative changes for precipitation  
603 and radiation. Finally, these  $0.025^\circ \times 0.025^\circ$  fields were used to drive the SEMIC model. We also bias-  
604 corrected VIC surface albedo and considered SMB-elevation feedback in all simulations (Yue et al.,  
605 2021). Over the whole VIC, modelled SMB over the period 1991–2010 (Fig. 1d, Fig. 2) is well correlated  
606 ( $R=0.6$ ,  $p<0.05$ ) with an interpolated map from 60 measurement sites (Björnsson et al., 2013), although  
607 the mean is overestimated by  $0.61 \text{ m yr}^{-1}$ .”

608

609 Line 83, what does “in reasonable agreement” mean? Some quantification or comparison would be useful  
610 here.

611 Done. We corrected:

612 “Over the whole VIC, modelled SMB over the period 1991–2010 (Fig. 1d, Fig. 2) is well correlated



613 (R=0.6, p<0.05) with an interpolated map from 60 measurement sites (Björnsson et al., 2013), although  
 614 the mean is overestimated by 0.61 m yr<sup>-1</sup>.”

615

616 Line 86 (figure 1 caption) A) is not a location map, it only shows the Vatnajökull ice cap not where it  
 617 is located in Iceland, suggest to put inset map that shows whole of Iceland and where Vatnajökull is  
 618 located in figure 1a), not that one ‘ is missing in Tungnaárjökull (the second a should be á) , in d) is  
 619 the “annual average”? suggest to clarify

620 Done. We corrected:

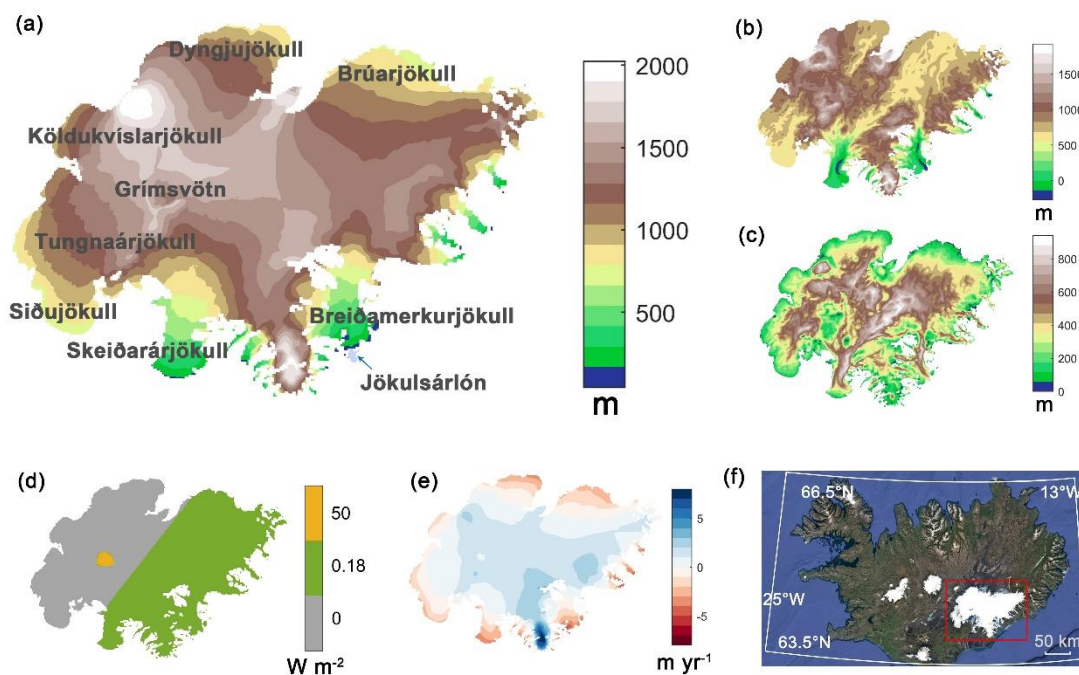

621

622 **Figure 1.** Model input data fields. (a) Vatnajökull ice cap (VIC) surface elevation from Spot5 (data  
 623 processing methods see Berthier and Toutin, 2008) in summer 2010; (b) bedrock elevation (Björnsson,  
 624 1986; Björnsson and Pálsson.2020); (c) ice thickness; (d) applied upward geothermal heat flux (Flowers  
 625 et al. 2003), including the Grímsvötn active volcano. (e) annual average surface mass balance 1982-1999  
 626 simulated by SEMIC forced by four Earth System Models (Yue et al., 2021). (f) the geographical location  
 627 of panel (a, red box) observed by Google Earth.

628

629 Line 89 “equilibrium line boundary” is a strange wording, suggest to use the commonly used  
 630 “equilibrium line altitude”, add something like “applied” or “assumed” before upward geothermal heat  
 631 flux

632 Done. See revisions above.

633

634 Figure 1, see comment above, there is space in this figure (lower right corner) to add observed SMB that  
 635 would aid the missing comparison with observation (see line 83)

636 Done. We added the geographical location of VIC in lower right corner, but we added text in quantitative  
 637 comparison between modelled and observed SMB:

638 “Over the whole VIC, modelled SMB over the period 1991–2010 (Fig. 1d, Fig. 2) is well correlated  
 639 (R=0.6, p<0.05) with an interpolated map from 60 measurement sites (Björnsson et al., 2013), although  
 640 the mean is overestimated by 0.61 m yr<sup>-1</sup>.”

641

642 Line 91, here it is stated that PISM is forced with monthly SMB fields (see comment line 78), what is  
643 the time resolution of the forcing?

644 It's monthly, we have corrected above errors.

645

646 Line 92-93 sentence is strange, something is missing, suggest something like: The final year of the spin-  
647 up simulation is then used as the initial condition in the experiments (or scenario simulations).

648 Done. We followed your suggestion.

649

650 Line 96, figure 2 caption, suggest to add "simulation" after spin-up and also state if the forcing is annual,  
651 monthly or daily averaged over this period (hat is the time resolution of the forcing?) and also make sure  
652 the period is consistent, here it is stated 1982-1999, in Figure 1 the average surface mass balance is shown  
653 for the period 1982-2005.

654 Done. We added "simulation" in figure caption, and we revised figure 1 SMB period to 1982–1999.

655

656 Line 97 here it is stated that PISM is forced with 4 different ESM, is then the SEMIC model not used?  
657 See comment above, suggest to be consistent in describing the surface forcing method.

658 SEMIC modelled SMB was used to drive PISM. We revised caption:

659 "PISM modelled Vatnajökull ice cap (VIC) volume change (a) from the 2000-year climate spin-up  
660 simulation driven by repeated monthly SMB fields during 1982–1999 from SEMIC modelling outputs  
661 (Yue et al., 2021), driven with downscaled and bias-corrected climate forcings by four Earth System  
662 Model."

663

664 Line 99, it is strange to show the ensemble mean spatial distribution, as 2 of the models in the 4 piece  
665 ensemble have negative and 2 have positive difference, these could therefore cancel out in some location,  
666 suggest to either show only one, or all four, so it is possible to assess the performance of each simulation.

667 Line 101, is the magenta line the ensemble mean extent? See comment above, it is more useful to show  
668 each model separately.

669 Done. We showed four ESM separately. The magenta curves represent the extent after spin-up.

670

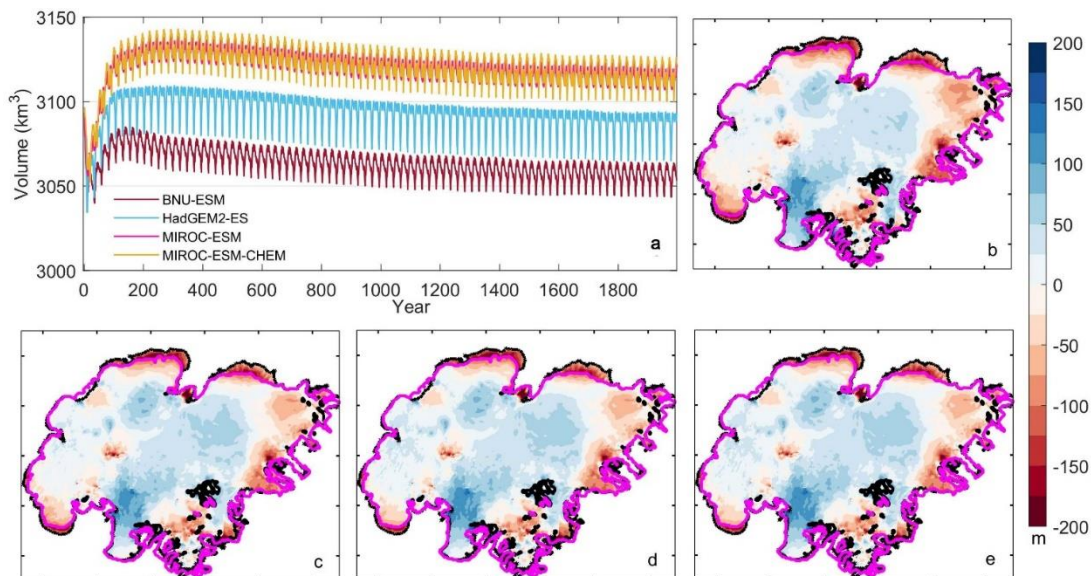

671 **Figure 3.** PISM modelled Vatnajökull ice cap (VIC) volume change (a) from the 2000-year climate spin-  
672 up simulation driven by repeated monthly SMB fields during 1982–1999 from SEMIC modelling outputs  
673 (Yue et al., 2021), driven with downscaled and bias-corrected climate forcings by four Earth System  
674 Model. The equilibrium volume is slightly different than present day by -1.3% for BNU-ESM, -0.5% for  
675 HadGEM2-ES, and 0.8% for both MIROC models. Subplots (b–e) are the spatial distribution of VIC  
676 thickness differences (ice thickness after spin-up minus present ice thickness) from PISM driven by (from  
677 b–e) BNU-ESM, HadGEM2-ES, MIROC-ESM and MIROC-ESM-CHEM. The black curves represent  
678 the present ice cap extent. The magenta curves represent the extent after spin-up.

679

680 Line 103 suggest to add a reference for SMB-altitude feedback. Add “change” after elevation. See  
681 comment above about the period, in caption for Figure 2 the period is stated 1982-1999

682 Done, we added Edwards et al. (2014), we added “change” after elevation. We would like to keep the  
683 reference period as 1982–2005, as we would like to consider the feedback in CMIP5 future scenario.

684 Edwards, T. L., Fettweis, X., Gagliardini, O., Gillet-Chaulet, F., Goelzer, H., Gregory, J. M., Hoffman,  
685 M., Huybrechts, P., Payne, A. J. and Perego, M.: Effect of uncertainty in surface mass balance–elevation  
686 feedback on projections of the future sea level contribution of the Greenland ice sheet, *Cryosph.*, 8(1),  
687 195–208, 2014, doi.org/10.5194/tc-8-195-2014

688

689 Line 104, suggest to use another word than “correct”, It is not clear that the resulting SMB is more correct  
690 than the original (how can you assess that?), in equation it is called SMB<sub>adj</sub>, why not call it then “adjusted”  
691 with more explanation?

692 Done. We changed to:

693 “We therefore considered the SMB-elevation feedback in annual SMB forcing with the  $k$ ,”

$$694 \text{SMB}_t^{\text{adjusted}} = \text{SMB}_t^{\text{SEMIC}} + k \times (h_{t-1}^{\text{PISM}} - h_0^{\text{PISM}}) \quad (7)$$

695

696 Line 105 suggest to use different wording for “ESM-dependent “SMB lapse rate”” suggest to explain  
697 better what is meant and define what  $k$  is and how it is determined.

698  $K$  is the gradient of annual mean SMB with observed surface elevation during 1982–2005. We corrected:  
699 “The SMB-elevation feedback (Edwards et al., 2014) alters SMB as VIC topography evolves, and we  
700 take this into account in the 2006–2089 simulations. Yue et al. (2021) found VIC surface elevation  
701 changes and historical SMB over 1982–2005 were significantly correlated ( $R^2 > 0.7$ ,  $p < 0.01$ ), and  
702 calculated the “SMB lapse rate”  $k$  (the gradient of annual mean SMB with surface elevation during 1982–  
703 2005) in different ESM. We therefore adjust SMB forcing, and ice thickness changes modelled by PISM  
704 in the year  $t$  from 2006 to 2089 as”

705

706 Line 109, see comment above, suggest to “adjusted” rather than “corrected”

707 Done.

708

709 Line 110, is this the modelled ice thickness in 2005? In Figure 2 is appears to be in year 1999 why is  
710 2005 selected? See comment above, how is  $k$  determined?

711 The  $h_0^{\text{PISM}}$  in Line 110 means the modelled ice thickness value is at the end of 2005, the choice of  
712 2005 instead of 1999 is because we just want to consider the SMB-elevation feedback in CMIP5  
713 RCP future scenario.  $k$  values are explained in reply of Line105. We corrected the  $h_0^{\text{PISM}}$  description:  
714 “ $h_0^{\text{PISM}}$  is the modelled ice thickness at the end of 2005”. We also added: “We considered SMB-

715 elevation feedback in the CMIP5 future period 2006–2089.” in section 2.4, to make the period of  
716 feedback correction clearer.

717

718 Line 112-113, this text reads awkwardly, suggest to use volume change for the evolution, but here write  
719 the difference between steady state and measured, or something like that. Is the average over one year  
720 used? From Figure 2 it appears that the seasonal volume change is considerable.

721 Yes, it is the average over one year (2000), We corrected:

722 “After the spin-up, VIC volume differences (averaged over 1 year) for the four ESM are between -1.3 %  
723 and 0.8 % of measured volume, while the area is around 16 % lower than observed (Fig. 3).”

724

725 Line 113 suggest to replace “Ice area loss” with difference between simulated state state and measured,  
726 see comment above. Suggest to replace “over” with “at”

727 Done. We corrected:

728 “Differences between simulated state and measured are mainly at the outlet glaciers of Dyngjujökull,  
729 Brúarjökull and Síðujökull (location see Fig. 1, Fig. 3) where the measured ice thicknesses are less than  
730 100 m.”

731

732 Line 115, suggest to add “measured” before “ice thickness”. Also suggest to use difference between  
733 steady state (or spin-up state) and measured, rather than “changes”

734 Done.

735

736 Line 116, this phrasing “are consistent across all the ESM” is strange, suggest to write something like  
737 the spin-up steady states forced with the 4 ESM have similar steady-state geometry, or something like  
738 that

739 Done, we changed to “Differences between steady state and measured in VIC geometry are largely  
740 determined by the SMB field, and the spin-up steady states forced with four ESM have similar steady-  
741 state geometry (Fig 3, b–e).”

742

743 Line 117 here is strange wording, suggest to replace “that drive SMB” with something mentioning  
744 SEMIC model. Here is for first time the “bias-correction with ERA5 reanalysis mentioned, it should be  
745 clearer before that the all the ESM are “bias-corrected” with the same data.

746 Done. We corrected “This because all climate variables (e.g., surface air temperature, downward  
747 longwave and shortwave radiation) that drive SEMIC model are bias-corrected with ERA5 reanalysis  
748 using ISIMIP approach (Section 2.3).”

749

750 In line 82 it is stated that ESM were bias corrected using ISI-MIP. What does that actually mean? Are  
751 the annual or monthly averaged added or subtracted from the ESM values?

752 ISI-MIP is a trend-preserving approach so that the long-term climate trends in models are preserved,  
753 while the mean at each grid cell is matched to observations. There are two fundamentally different ways  
754 ISIMIP can do the correction: addition and multiplication. The additive approach is used for most fields  
755 preserving e.g. the absolute changes of the monthly temperature; while the multiplicative method is used  
756 for preserving the relative changes for precipitation and radiation. We added a brief description of ISI-  
757 MIP in Section 2.3

758 “The ISIMIP is a trend-preserving approach so that the long-term climate trends in models are preserved,

759 while the mean at each grid cell is matched to observations. There are two fundamentally different ways  
 760 ISIMIP can do the correction: addition and multiplication, and we follow ISIMIP protocol in deciding  
 761 which method to use for each meteorological field variable (Hempel et al. 2013). The additive approach  
 762 is used for most fields preserving, e.g. the absolute changes of the monthly temperature; while the  
 763 multiplicative method is used for preserving the relative changes for precipitation and radiation.”

764  
 765 Line 118-124 this whole explanation is very confusing, suggest editing the whole paragraph. The  
 766 discrepancies are not caused by surging glaciers, the fact that most of the outlet glacier of Vatnajökull on  
 767 the north and western side are surging and the model does not include any surging could be the reason  
 768 for the model failing in simulating the observed ice thickness, that should be made clearer in this  
 769 paragraph. Suggest to take out “not parameterized” and use something like, not modelled or not  
 770 included.

771 We revised:

772 “The largest discrepancies between the spin-up and present area for VIC, are likely due to surge type  
 773 glaciers, which is not a process simulated by PISM. Many glaciers on the northern and western sides of  
 774 VIC are of surge type (Björnsson et al., 2003), and this is where differences in observed ice thickness  
 775 and in PISM are largest. Surges rapidly move long-accumulated ice from the upper glacier towards the  
 776 terminus, so that at any particular time the upper and lower glacier are not in the average state that PISM  
 777 simulates. Thus, the spin-up is unlikely to achieve a present-day area coverage, although total volume is  
 778 close to observed.”

779

### 780 3 Ice cap volume and area from 1982 to 2089

781 Line 127, In Table 1 only 2089 relative to 1982 is shown, not the difference during 1991-2014, was that  
 782 intended?

783 No, the changes 1991-2014 are shown in Table 1 (in bold here).

784 **Table 1.** Vatnajökull ice cap volume and area change (%) during 1991–2014 (volume during 2006–2014  
 785 is the mean of RCP4.5 and RCP8.5 scenarios), and 1982–2089 under G4, RCP4.5 and RCP8.5 scenarios  
 786 modelled by PISM forced by BNU-ESM, HadGEM2-ES, MIROC-ESM, MIROC-ESM-CHEM, the  
 787 ensemble mean and 95% confidence intervals, N=4. Numbers in brackets represent changes without  
 788 considering SMB-elevation feedback.

|        |                  | BNU-ESM  | HadGEM2-ES | MIROC-ESM | MIROC-ESM-<br>CHEM | Ensemble   |
|--------|------------------|----------|------------|-----------|--------------------|------------|
| Volume | G4               | 14 (13)  | 10 (10)    | 11 (11)   | 13 (12)            | 12±2       |
|        | RCP4.5           | 21 (20)  | 18 (17)    | 11 (11)   | 13 (13)            | 16±4       |
|        | RCP8.5           | 25 (23)  | 23 (22)    | 20 (20)   | 22 (21)            | 22±2       |
|        | <b>1991-2014</b> | <b>2</b> | <b>2</b>   | <b>0</b>  | <b>0</b>           | <b>1±1</b> |
| Area   | G4               | 10 (9)   | 6 (6)      | 8 (7)     | 9 (8)              | 8±2        |
|        | RCP4.5           | 14 (12)  | 11 (11)    | 8 (7)     | 9 (9)              | 10±3       |
|        | RCP8.5           | 15 (14)  | 14 (14)    | 12 (12)   | 13 (12)            | 14±1       |

789

790 Line 127-128 neither the overestimation of SMB nor the disappearance of fast melting region are shown,

791 more explanation is needed here.

792 OK, we rephrase this:

793 “Pálsson et al. (2015) record a 3% reduction in volume between 1991–2014 which is more than the  $1 \pm 1\%$   
794 (we define uncertainties in this study as the ensemble mean and 95% confidence interval,  $N=4$ ) we  
795 simulate (Table 1). This is due both to the VIC SMB used to force PISM being overestimated by  $0.61 \text{ m}$   
796  $\text{yr}^{-1}$  compared with the interpolated map from 60 site measurements during 1991–2010 (Björnsson et al.,  
797 2013), and also the rapid loss of area during the model spin up which removed the thin and fast melting  
798 regions at Dyngjufjökull and Brúarjökull (Fig. 1, Fig. 3, b–e).”

799

800 Line 132, suggest to edit this sentence, it is very vague and more quantification and comparison would  
801 be useful, “likely reason” and “somewhat difference ice cap geometry” could be made clearer or better  
802 quantified.

803 We quantitatively showed the difference between observed and steady state VIC geometry at eastern outlet  
804 glaciers:

805 “However, there are some large differences mainly over the eastern outlet glaciers where PISM  
806 overestimates the velocity by more than  $100 \text{ m yr}^{-1}$ . This is related to VIC surface elevations being 50–  
807 150 m lower than measured at eastern outlet glaciers (Fig. 3).”

808

809 Line 135-137 suggest to edit the whole figure caption and reconsider the ensemble and scenario averaged,  
810 suggest to show only one, or maybe two (there is space in the figure for at least, if not 3 more subfigures).  
811 The text is redundant in two places “RCP4.5 and RCP8.5” are two times in same sentence and “average”  
812 and “mean”, suggest to delete one of the two occurrences.

813 We showed separate model results under RCP4.5, instead of model and scenario mean. We changed:

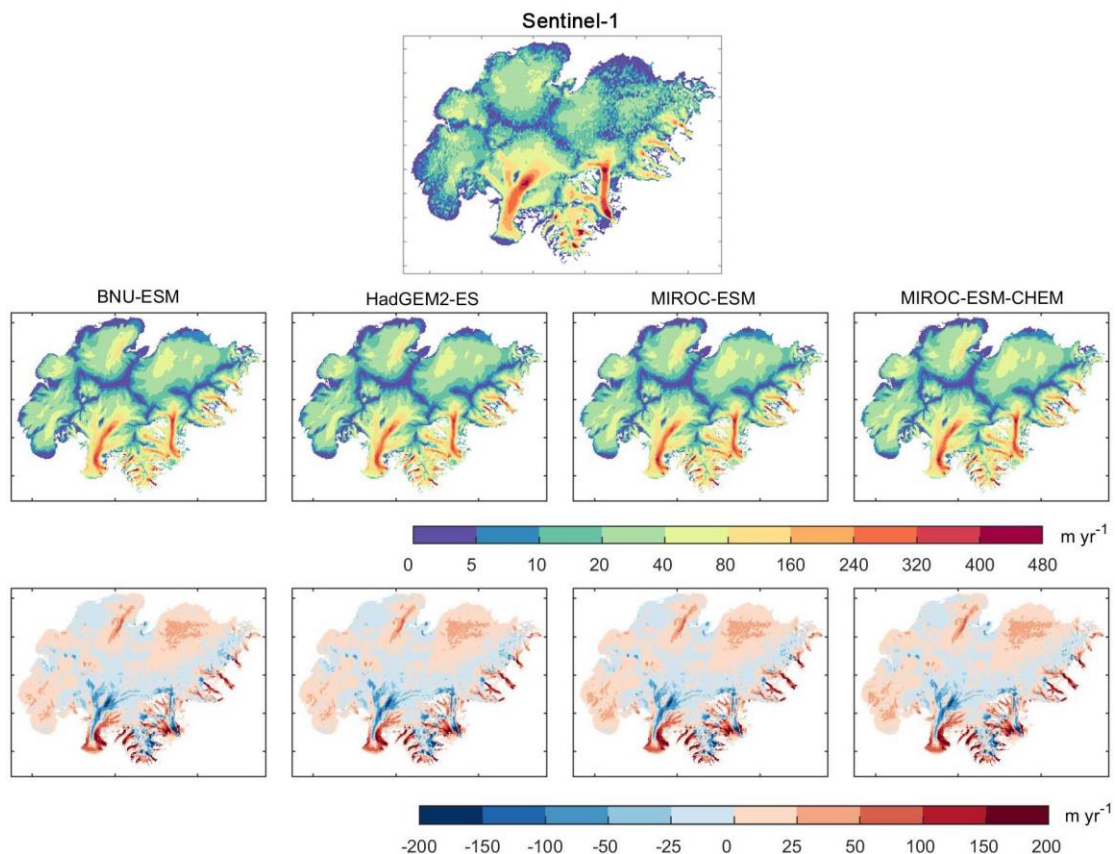

814

815 Figure 4. Top: Mean surface velocity over VIC from Sentinel-1, 100 m spatial resolution product (Wuite  
816 et al., 2021). Middle row: mean 2015–2020 surface velocities simulated by PISM under the RCP4.5  
817 scenario from the 4 Earth System Model as labeled. Bottom row: the PISM-Sentinel differences.

818

819 Line 137 suggest to replace “spaced” with “spatial resolution” and replace (upper left) with (upper right)  
820 Done.

821

822 Line 139 see comment above Table 1 does not show historical changes as stated in lines 126 ad 140.

823 It does, see reply of Line 127.

824

825 Line 141 are those 12% and 22% values relative to initial (which?) or maximum volume? It is not clear  
826 from text

827 It’s during 1982-2089, so, the volume change is relative to 1982, we corrected:

828 “During the period 1982–2089, annual volume loss and SMB are well correlated in all ESM (Fig. S1;  
829  $R=0.98$ ,  $p<0.01$ ). The across-ESM ensemble mean of VIC volume loss is decreased by as little as 12 %  
830 under G4 to as much as 22 % under RCP8.5.”

831

832 Line 142, add “loss” after “volume”

833 Done.

834

835 Line 144 missing ‘over second a in Tungnaárjökull

836 Corrected.

837

838 Line 145 This statement is not correct as shown in the 4th row of figure 5 for both the MIROC simulations,  
839 the difference is 0 (negative values are not shown, if there are any?) and the volume and area loss of G4  
840 and RCP4.5 are very similar as shown in Figure 4

841 Yes, it has some negative values, but could be ignored. We changed the colorbar of Figure 4, the scale is  
842 from -10 to 110 m. We corrected:

843 “Surface thinning under G4 is smaller than that under RCP4.5 in BNU-ESM and HadGEM2-ES, while  
844 two MIROC models display negligible differences ( $<5$  m) in surface elevation.”

845

846

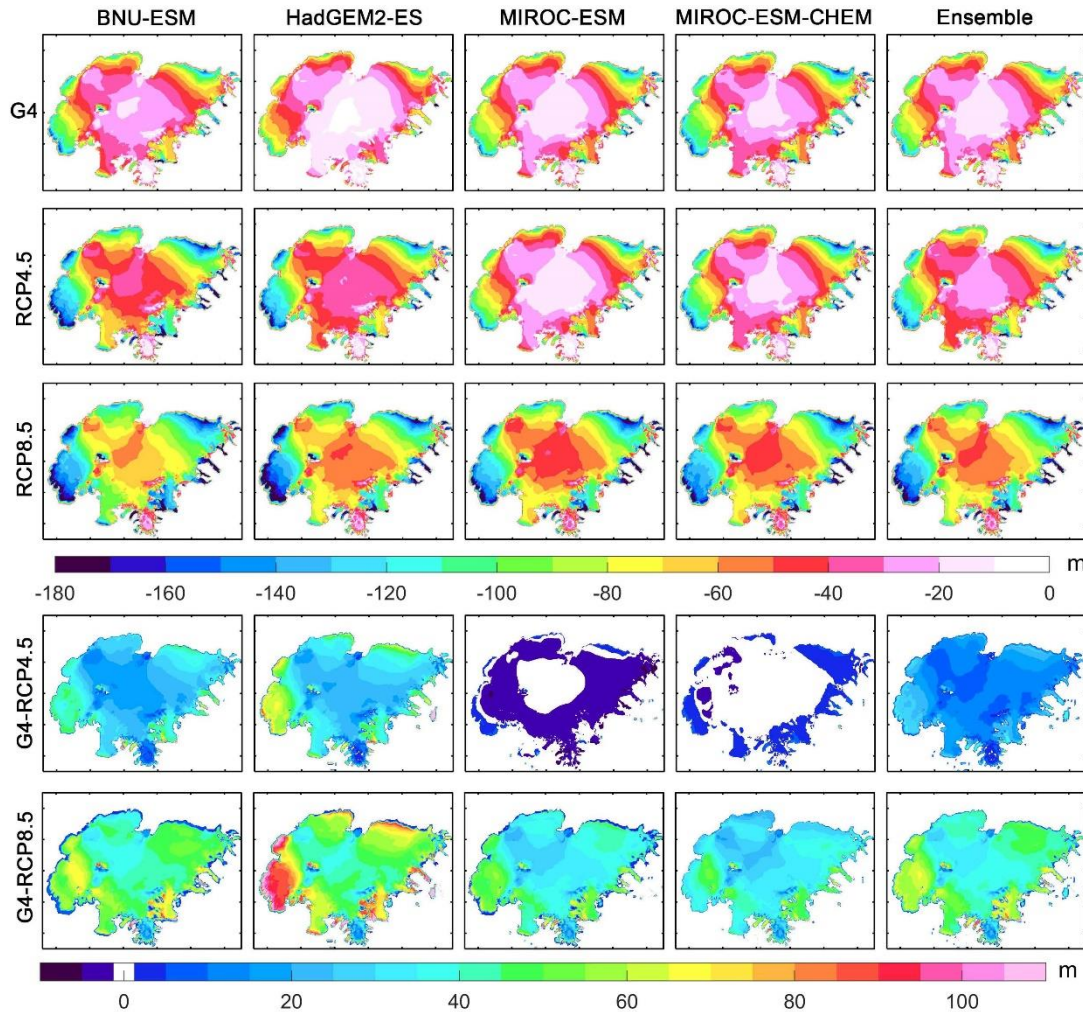

848 Figure 6. The ice thickness differences from PISM outputs between the year 1982 and 2020 over  
 849 Vatnajökull ice cap under G4 (1<sup>st</sup> row), RCP4.5 (2<sup>nd</sup> row) and RCP8.5 (3<sup>rd</sup> row) scenarios, and their  
 850 differences (G4-RCP4.5, 4<sup>th</sup> row; G4-RCP8.5, 5<sup>th</sup> row) by Earth System Model (ESM, from left to right),  
 851 BNU-ESM, HadGEM2-ES, MIROC-ESM, MIROC-ESM-CHEM and ensemble mean. The initial state  
 852 in 1982 is different for each ESM.

853

854 Line 145-146 this statement of G4 increasing ensemble ice thickness is strange, see comment above  
 855 about ensemble mean not being useful, and that G4 increasing thickness is not true, the response of the  
 856 model when G4 is that the thinning of the ice cap is reduced.

857 We disagree about the ensemble mean being useful, but we rewrote:

858 “By 2089, all four ESM simulations under all scenarios produce surface thinning over the whole VIC  
 859 especially over Tungnaárjökull, Brúarjökull (location see Fig. 1) and eastern small outlet glaciers (Fig.  
 860 5). Surface thinning under G4 is smaller than that under RCP4.5 in BNU-ESM and HadGEM2-ES, while  
 861 two MIROC models display negligible differences (<5 m) in surface elevation.”

862

863 Line 149 see comment above, the ensemble mean is really not useful here, as it is taking the attention  
 864 away from the interesting differences in the model responses.

865 We disagree that the ensemble mean is useful, however that is not relevant to this line which describes a  
 866 figure with all the separate models plotted as well as the ensemble mean. We also added the description



867 in Section 3 to emphasize the individual models results.

868

869 Line 150 suggest to replace “Estimates considering ice dynamic from PISM” with “volume and area loss  
870 simulated by including ice dynamics”

871 Done.

872

873 Figure 5 in top line MIROC-ESM is misspelled as MIROE. The two bottom line figures should be shown  
874 with the same color scale for aiding comparison it is misleading to show differences with same color  
875 scale but different values, suggest to have both scales go to 100 m so that for example yellow color  
876 doesn't show 50 m in one and 70 m in the other row. It is not clear (figure caption states ice thickness  
877 differences between 2089 and 1982 is it the same initial state or ESM specific 1982 state? How different  
878 are the initial states at 1982?

879 We corrected the “MIROC” and used the same color scale. The initial state is ESM specific state, but  
880 each ESM state is very similar (Figure 3). We revised the color bar in figure as suggested:

881

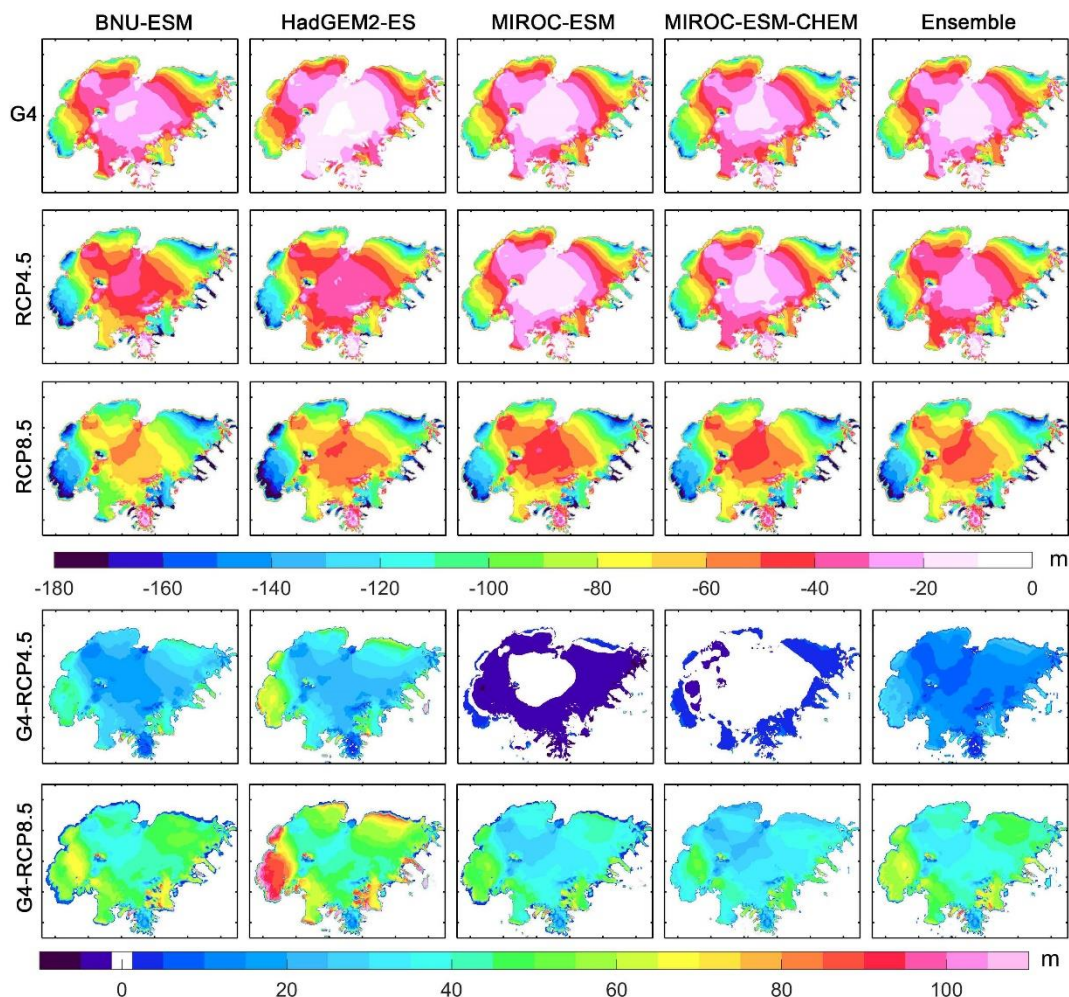

882 Figure 6. The ice thickness differences from PISM outputs between the year 1982 and 2020 over  
883 Vatnajökull ice cap under G4 (1<sup>st</sup> row), RCP4.5 (2<sup>nd</sup> row) and RCP8.5 (3<sup>rd</sup> row) scenarios, and their  
884 differences (G4-RCP4.5, 4<sup>th</sup> row; G4-RCP8.5, 5<sup>th</sup> row) by Earth System Model (ESM, from left to right),  
885 BNU-ESM, HadGEM2-ES, MIROC-ESM, MIROC-ESM-CHEM and ensemble mean. The initial state  
886 in 1982 is different for each ESM.

887

888 Table 1 In this table no historical differences are shown as stated in Lines 127 and 139 (see comments  
889 above). See comments above that the ensemble mean with 4 ensemble members is not useful here.  
890 This table shows that very little difference is between the runs that couple ice dynamics with the SMB  
891 and the runs that have only SMB, therefore the statement in abstract line 18 seems an overestimate, how  
892 is ¼ and 1/3 difference found?

893 The historical period loss is in the table as shown in reply to the earlier questions where we reproduced  
894 the table. We disagree about the ensemble mean being useful, as this is common practice, e.g. by IPCC,  
895 and in any case the separate ESM are also listed in the table, so removing the ensemble mean would only  
896 make the table less informative than at present. The numbers in brackets are without considering SMB-  
897 elevation feedback, and **not** the volume changes only caused by SMB. We show how the non-SMB  
898 component is derived in Section 4: Ice cap SMB, MB and non-SMB from 2020-2089, which is  
899 immediately after this table, and we show where the 1/4-1/3 factors arise. However, we revised the  
900 abstract to make the description clearer:

901 “All ESM show that the non-SMB component (i.e., ice dynamics and basal melting) remains nearly  
902 constant at around  $-0.25 \text{ m yr}^{-1}$  and is remarkably insensitive to climate forcing over time for all scenarios.  
903 This non-SMB component is important for ice cap loss rates compared with mass balances of  $-0.47$ ,  $-$   
904  $0.61$  and  $-0.88 \text{ m yr}^{-1}$  over the 1982–2089 period under G4, RCP4.5 and RCP8.5, respectively.”

905

## 906 **4 Ice cap SMB, MB and non-SMB from 1982 to 2089**

907 Line 163 “with maximum of more than 400 m” this seems large, given the mean thickness of the ice cap.  
908 Over how long period? What are the velocities that move this accumulated mass? Is this realistic or  
909 not?

910 It’s over the 1982–2089, as is said fig.6 caption. Fig. 1d shows that in the area with maximum height  
911 gain, the SMB is 6-8 m/yr. Over a century this plausibly can explain why the SMB can raise elevations  
912 by 400 m. Velocities are given in revised Fig. 4 both from Sentinel and PISM as shown above. We rewrite  
913 the section more explicitly:

914 “In Fig. 7, we separate the SMB and non-SMB (ice dynamics and basal melting) components of overall  
915 mass balance. Over the 1982–2089 period, simulated SMB decreases the average ice thickness of the  
916 whole VIC by 40–80 m especially over the outlet glaciers of Skeiðarárjökull and Breiðamerkurjökull  
917 (location see Fig. 1) while increasing the ice thickness over the interior of VIC, by a maximum of 400 m  
918 over the southern region of VIC where mass balances are highest (Fig. 1e). There is a larger area of  
919 surface thinning region under RCP8.5 than under RCP4.5 and G4 scenarios due to the higher air  
920 temperatures (Yue et al., 2021).”

921

922 Line 165-166 suggest to edit, “the smallest area of surface thinning” is strange wording. Also given the  
923 known higher temperature in RCP8.5 it is not surfacing that surface thinning is stronger for that scenario,  
924 by how much? Is even over the ice cap? Is it realistic differences? Why is there so little difference  
925 between RCP4.5 and RCP8.5 in the MIROC simulations?

926 We corrected:

927 “There is a larger area of surface thinning region under RCP8.5 than under RCP4.5 and G4 scenarios due  
928 to the higher air temperatures (Yue et al., 2021).”

929

930 Line 166 this sentence “Non-SMB components display the opposite pattern to SMB” should be deleted,  
931 it indicates little understanding of dynamics of ice cap.

932 Done.

933

934 Line 166-169 suggest to delete or edit this sentence to include ice dynamic understanding as it is written  
935 is seems like authors are analysing model results that are little understood.

936 We have rewritten these sentences to be clearer:

937 “Positive non-SMB contributions to mass balance are visible in all ESM and scenarios around the  
938 margins, because as the negative SMB reduces surface elevation in the margins, the surface gradient  
939 between the interior and the margins is increased, driving an increased ice flux into the margins.  
940 Conversely, this increased ice flux removes mass from the interior, making the non-SMB component  
941 there negative.”

942

943 Line 170-176 See comments above, the interesting results are that there is difference between the  
944 responses of the different ESM forcings, giving numbers for the ensemble (and showing in Figure 6) is  
945 hiding these interesting results.

946 We added descriptions for individual ESM.

947 “Basal melting is driven by non-climate factors and so remains essentially unchanged under the scenarios.  
948 The pattern of non-SMB contributions for individual ESM are all quite similar, the largest differences  
949 being mainly over the ablation zone, with the across-model standard deviations more than 10 m (Fig.  
950 S2).

951

952 Fig. 7b demonstrates that surface height differences (G4-RCP4.5) by 2089 are mainly caused by SMB  
953 rather than non-SMB effects. Ensemble mean SMB under G4 increases VIC mean surface height by  
954 around 20 m than RCP4.5 scenario, largely due to BNU-ESM and HadGEM2-ES, while the difference  
955 is less than 10 m for both MIROC models (Fig. S3–S6). For G4-RCP8.5, SMB driven height differences  
956 under HadGEM2-ES are moderately greater than for BNU-ESM, and much greater than in two MIROC  
957 models, especially at Tungnaárjökull, Dyngjufjökull and Brúarjökull (location see Fig.1). G4 dynamically  
958 thickens the ablation zone relative to the RCP scenarios, while thinning the accumulation area. The  
959 dynamic impact on surface height differences between G4 and RCP4.5 is much less between G4 and  
960 RCP8.5 (Fig. 7b). Surface height differences (G4-RCP4.5) by non-SMB in both MIROC models are 0–  
961 5 m, notably less than that in BNU-ESM and HadGEM2-ES.”

962

963 .

964 Line 178-182 analysing the ensemble mean really hides the results shown in Figure 4, suggest to focus  
965 on that, rather than the ensemble mean with such small number of members and varying responses.

966 Agreed:

967 “The non-SMB contributions, however, remain nearly constant (around  $-0.25 \text{ m yr}^{-1}$ ) over time across all  
968 scenarios and ESM (Fig. 7, Fig. S3–S6). These are fairly large fractions of total ice cap loss rates, but  
969 diminish in relative size as MB becomes more negative from  $-0.47 \text{ m yr}^{-1}$  during 1982–2089 under G4,  
970 to  $-0.61 \text{ m yr}^{-1}$  under RCP4.5, and  $-0.88 \text{ m yr}^{-1}$  under RCP8.5. Simulations under individual ESM are  
971 shown in Fig S3–S6, the responses of MB to G4 and RCP scenarios are very similar to changes in ice  
972 cap volume and SMB. MB has the smallest differences (G4-RCP4.5) for the two MIROC models, but

973 relatively large differences for BNU-ESM and HadGEM2-ES.”  
974  
975 Figure 6 See comment above about the ensemble mean, the different responses between the 4 ESM is  
976 really interesting and that is lost in this figure that only shows the means and therefore misleading. Here  
977 the reference is year 2020 but both in Figure 5 and Table 1 the reference year is 1982, why not have the  
978 same reference in all figures and table?  
979 We added the descriptions about the individual model results, and we changed period to 1982–2089 that  
980 consistent with above figure.  
981  
982 In figure 6b) large difference is between the dynamic (here called (dynamic), in (a) it is called (non-  
983 SMB), suggest to be consistent). How can the dynamic part be so different with same ice dynamic model?  
984 Figure 7 shows that the non-SMB part is very similar for all simulations, this figure is really strange  
985 showing such a large difference. The difference between G4 and RCP4.5 is very small, but Figure 4  
986 shows that each of the ESM has very different response.  
987 We changed the label to “non-SMB” instead of “dynamic”. See reply to next comment for more.  
988  
989 Line 192-196 see comment above, suggest to discuss separately each ESM response, as shown in Figure  
990 7, than the mean. The large 95% confidence interval with N=4 clearly shows how variable the responses  
991 are.  
992 We changed:  
993 “During the SAI G4 implementation period 2020–2069, G4 increases ensemble mean MB by between  
994  $0.21 \pm 0.17 \text{ m yr}^{-1}$  (95% confidence intervals; N=4) compared with RCP4.5 and by  $0.33 \pm 0.22 \text{ m yr}^{-1}$   
995 compared with RCP8.5, which are very similar to the SMB differences of  $0.20 \pm 0.16 \text{ m yr}^{-1}$  (G4-RCP4.5)  
996 and  $0.31 \pm 0.21 \text{ m yr}^{-1}$  (G4-RCP8.5). These numbers demonstrate that the extra ice mass preserved under  
997 SAI is through the increases of SMB, rather than non-SMB components, especially in BNU-ESM and  
998 HadGEM2. The two MIROC models project almost no differences in both MB and SMB between G4  
999 and RCP4.5, and so is again consistent with the domination of SMB in changing MB, and the unchanging  
1000 magnitude of the non-SMB component. The SMB and MB under G4 have much larger across-ESM  
1001 differences than between the two RCP scenarios, due the differences of G4 atmospheric forcings between  
1002 each ESM (Yue et al., 2021).”  
1003

## 1004 **5 Discussion**

1005 Line 202-203 this sentence could be more clear, the non-SMB appears to have similar value throughout,  
1006 which I think is clearer information than the the fraction becomes less important.  
1007 We changed:  
1008 “During the historical period, our simulations show the overall mass loss on VIC is about equally divided  
1009 between SMB and non-SMB components, but as SMB becomes more negative, the proportion of MB  
1010 due to non-SMB becomes less, as non-SMB component remains constant over the whole simulation  
1011 period (Fig. 7c).”  
1012  
1013 Line 207 this is strange, what about the impact on precipitation or temperature? I would think that it  
1014 directly the forcing that impacts the response, rather than the degree of imbalance, could you confirm?

1015 Yes, the actual ice mass loss in HMA depends on the forcing, the point of this sentence is about the  
1016 relative efficacy. We added that forcing is of course important.

1017 “The differences in efficacy from VIC to HMA are related not only to the climate forcing differences  
1018 between scenarios, but also to the degree of imbalance of the ice masses in present and recent climate,  
1019 with most of HMA losing ice mass throughout the last century, so losses by 2069 under RCP4.5 are 73%,  
1020 and under G4 59%, of present-day glacier mass. Iceland has been much closer to balance until recently.”

1021

1022 Line 209 “Iceland has been closer to balance until recently” is not very clear, what is recent here? The  
1023 glaciers in Iceland were close to balance in period 1960-1995, after 1995 the mass balance became  
1024 negative, and the rate of mass loss reduced after 2010.

1025 Yes, this is much close to balance than HMA has been throughout the 20<sup>th</sup> century. We added “much”:

1026 “Iceland has been much closer to balance until mid-1990s.”

1027

1028 Line 211 it is strange to discuss the relative effectiveness of SAI on reducing surface runoff, what is the  
1029 effect on precipitation, temperature, atmospheric circulation?

1030 Actually, the surface runoff should be called “surface-melted runoff” that is largely determined by  
1031 melting water, so, it is a key variable to reflect the changes of temperature. We replace it with “surface-  
1032 melted runoff”. We added one paragraph to describe the geoengineering effect on precipitation,  
1033 temperature:

1034 “In G4, changes in Atlantic Ocean circulation may increase VIC temperatures. Projections by all ESM  
1035 with data show AMOC index at 30°N is 0–4 Sv stronger in G4 than RCP4.5 (Fig. 9a), which acts to  
1036 increase heat flux from ocean to atmosphere near Iceland (Fig. 9d). However, the atmospheric cooling  
1037 associated with G4 SAI dominates the VIC climate, resulting in a 0.4°C reduction of air temperature and  
1038 a 6% lower surface melt-runoff under G4. There are across model differences, with the two MIROC  
1039 projecting little changes between G4 and RCP4.5 in temperatures and precipitation, and hence the  
1040 response of ice cap volume. Precipitation is the main component of mass accumulation, all ESM project  
1041 insignificant precipitation differences between G4 and RCP4.5. This is different from the global (Trisos  
1042 et al., 2018) and Greenland (Moore et al., 2019) cases where G4 reduces precipitation in most regions,  
1043 due to the fundamental difference between long wave greenhouse gas and shortwave SAI radiative  
1044 forcing. Greenhouse gases are distributed throughout the atmosphere, while shortwave radiation impacts  
1045 surface temperatures, hence temperature lapse rates are altered under SAI and the atmosphere is drier  
1046 than it would be for the same temperature under simple greenhouse gas climates. The changes  
1047 precipitation under G4 that are seen in VIC may be driven by the relatively enhanced AMOC and lower  
1048 Arctic sea ice (Xie et al., 2022) which in turn brings more water vapor to VIC.”

1049

1050 Line 212 It is not clear what the “compensating impact of AMOC changes” are here, the correlation  
1051 between AMOC and SMB is shown, but what are the physical relationship? (what effect of precipitation  
1052 and temperature are caused by AMOC changes?) this needs more discussion

1053 See the previous answer, which address how the AMOC brings warmth to Northern Atlantic regions.

1054

1055 Line 219 what is “SMB behavior” clarification is needed

1056 The SMB behavior is the correlation between SMB and AMOC. We changed to:

1057 “Fig. 9b-c shows that VIC MB is highly significantly correlated with AMOC ( $R=0.91$ ,  $p<0.01$ ), while  
1058 for Greenland there is no significant relationship ( $R=0.42$ ,  $p=0.35$ ), consistent with the SMB response to

1059 AMOC over VIC and Greenland (Yue et al., 2021).”

1060

1061 Line 222 the sentence “may induce larger dynamic effects earlier” is not clear, needs editing. The

1062 dynamic effect appears to be very similar throughout the simulations as shown in Figure 7

1063 We mean that dynamic effects would be expected earlier than in Greenland, but yes, they are not seen in

1064 the 50 year SAI period considered here. We clarified this sentence:

1065 “Because VIC is much thinner than the Greenland ice sheet, and has higher accumulation and ablation

1066 rates, the mass turnover time in VIC is at least 10 times faster than in Greenland meaning that surface

1067 climate may induce larger dynamic effects on centennial timescales.”

1068

1069 Figure 8 Why are now 8 different ESM shown? Why are not all included in the analysis earlier in the

1070 paper?

1071 Because for the G4 experiment only the 4 ESM that we analyzed in this paper have sufficient data

1072 available for SEMIC. The other 4 ESM we used is only to show the poor correlation between AMOC

1073 and GrIS mass balance. We stress the only 4 ESM available for geoengineering G4 experiments:

1074 “The SMB fields are modelled by a mass and energy balance model Section 2.1 and 2.3) driven by

1075 downscaled and bias-corrected climate forcings by all Earth System Model (ESM; Table 1) that have

1076 sufficient data fields available from both RCP and G4 scenarios.”

1077

1078 Line 228 “annual mean maximum” is strange here, how is it both mean and maximum?

1079 Should delete ‘mean’, We changed to:

1080 “The AMOC index is defined as the annual maximum of the overturning stream function over the Atlantic

1081 Ocean at 30°N”

1082

1083 Line 236 “effects might be expected to be rather too small to be seen” is strange here, suggest to edit

1084 section and clarify

1085 We deleted the word “rather”

1086 Line 239 something is missing “changing elevation-SMB” add “feedback”?

1087 Yes, done.

1088

1089 Line 242 not clear why “extreme maritime environment” (what is extreme about it?) makes a glacier

1090 most likely to exhibit a dynamical response, suggest to edit and clarify and also why such an effect I not

1091 seen in the experiment in this study.

1092 We mean that it is a modestly small ice cap adjacent to the North Atlantic Ocean and so much closer to

1093 the open sea that even those on Arctic archipelagos where seasonal sea ice covers the ocean for parts of

1094 the year. As noted earlier for the Line 39 comment on maritime glacier sensitivity to climate change

1095 (Oerlemans, 1992; Rupper and Roe, 2008). We make this more explicit:

1096 “The environment of VIC is close to open seas year-round, in contrast with the seasonally ice-covered

1097 waters near Vestfonna. Maritime glaciers tend to be more sensitive to climate that more continental ones

1098 (Oerlemans, 1992; Rupper and Roe, 2008), and so might be expected to exhibit a dynamical response to

1099 the SAI or RCP scenarios, but we see no such effect.”

1100

1101 Line 246 The sentence “Furthermore, retreat of the margins from the ocean” is not right here, there are

1102 no outlet glaciers of Vatnajökull residing in the ocean, the Jökulsárlón is inland lagoon, connected to the

1103 ocean by a river, but it is not ocean.  
1104 We corrected to:  
1105 “Furthermore, calving is confined to just the inland Jökulsárlón lagoon (location see Fig. 1).”  
1106  
1107 Line 251-251 sentence is strange and no connection between first and second part of it, suggest to edit.  
1108 We revised to:  
1109 “Some previous simulations of VIC had difficulty establishing present-day steady-state geometries in  
1110 spin-up simulations (Aðalgeirsdóttir et al., 2005; Marshall et al., 2005; Flowers et al., 2005). Our  
1111 modelled steady state VIC geometry is similar as observations, with only  $\pm 1\%$  differences in ice volume.  
1112 Our projections by 2089 show smaller losses ( $16\pm 4\%$  for RCP4.5, and  $22\pm 2\%$  for RCP8.5) than the e.g.  
1113 30% loss under RCP4.5 in Flowers et al. (2005). Perhaps unsurprisingly our results are consistent with  
1114 Schmidt et al. (2020), with a 17% volume loss under for RCP4.5, given that we use the same ice dynamic  
1115 model although with different SMB forcing. This leads to local differences in steady state ice thickness.”  
1116 ”  
1117 Line 255 suggest to edit “in various basin ice thicknesses by 2089” does not make sense here  
1118 Changed to “This leads to local differences in steady state ice thickness.”  
1119 Line 258 what does “the relatively parameterized SEMIC model” mean, suggest to clarify  
1120 Changed to: “especially in the SEMIC model, which uses parameterizations established in Greenland”  
1121 Line 259 suggest to edit “is still not perfectly captured” better to quantify, would you expect perfect  
1122 capturing? When?  
1123 Changed to: The steep geometry of some outlet glaciers is not fully resolved by the  $0.025^\circ \times 0.025^\circ$  (about  
1124  $1.2 \text{ km} \times 1.2 \text{ km}$ ) grid although the bias-correction using satellite observations of albedo corrects offsets  
1125 from model to observations.  
1126  
1127 Line 260-261 strange sentence suggest to edit and clarify, not clear how albedo compensates for resolution?  
1128 Bias correction serves to correct errors in mean state, so the relative lack of resolution of steep slopes  
1129 can be compensated for by the bias correction ensuring the mean matches the observations. We corrected:  
1130 “The steep geometry of some outlet glaciers is not fully resolved by the  $0.025^\circ \times 0.025^\circ$  (about  $1.2 \text{ km}$   
1131  $\times 1.2 \text{ km}$ ) grid although the bias-correction using satellite observations of albedo corrects offsets from  
1132 model to observations.”  
1133  
1134 Line 265 what is “de-weighting” suggest to edit  
1135 We revised:  
1136 “Moore et al. (2019) evaluated de-weighting each MIROC model in ensemble Greenland simulations;  
1137 reducing each MIROC model contribution to the ensemble mean by 25% made little difference to the  
1138 equal-weight ensemble means, and in general, the two ESM are considered independent in climate  
1139 simulations.”  
1140  
1141 Line 265-268 strange sentences and suggest to edit, it is speculative “could perhaps provide improved  
1142 polar impact studies  
1143 The sentence is essentially true since no one yet has published results with polar G6 impacts. Changed  
1144 to: The new generation of ESM that participated in CMIP6, and with new corresponding GeoMIP G6  
1145 experiment are slowly becoming available and might improve polar impact studies.  
1146

1147 Line 270 what does “not particularly effective” mean?  
1148 It is relative to geoengineering impacts in Greenland ice sheet. We corrected to:  
1149 “Although geoengineering by SAI is not as effective for VIC as Greenland, it does still slow the rate of  
1150 ice loss.”  
1151  
1152 Line 271 “unique geographical location” is strange, isn’t every location unique? “we may infer” is  
1153 strange here, suggest to delete  
1154 Yes, deleted unique.  
1155  
1156 Line 272 sentence is strange “will not lead to greater mass loss of any glacier or ice cap” suggest to edit  
1157 or delete  
1158 We corrected:  
1159 “The North Atlantic and maritime setting VIC makes it potentially more susceptible to the warming  
1160 impacts from AMOC under G4 than other Arctic ice caps. However, this study demonstrates that SAI as  
1161 specified by G4 will not lead to greater mass loss at VIC, and by extension, of any glacier or ice cap in  
1162 the northern hemisphere, than are expected under any plausible greenhouse gas scenario.”  
1163  
1164 Line 274-275 suggest to delete. What is “palatable governance issues”? Moore et al., 2020 is not in  
1165 reference list  
1166 Governance issues for SAI are very controversial and well explored in the literature. The topic is  
1167 relatively important here since one reason to explore the impacts of SAI is that is a reasonable chance of  
1168 it being done. The governance differences between localized innervations and SAI are discussed in  
1169 Moore, J. C., Wolovick, M., Gladstone, R., Chen, Y., Kirchner, S. and Moore, J. C.: Targeted  
1170 Geoengineering: Local Interventions with Global Implications, *Global Policy*, 12(S1), 108-118, 2020,  
1171 doi:10.1111/1758-5899.12867  
1172

## 1173 **6 Conclusion**

1174 Line 278 “reduces VIC mass loss by 4 percentage points” is strange, why not 4% ? suggest to edit  
1175 Because a percentage of a percentage is ambiguous. The standard way of describing a change e.g. from  
1176 8% to 4% is to say a reduction of 4% points rather than saying a reduction of 50% (from 8% to 4%).  
1177  
1178 Line 279 “SAI could help preserve VIC from melting” is not true, the melting of the ice cap happens also  
1179 in G4 simulations (suggest to replace “melt” with “mass loss” melting happens every summer)  
1180 Done.  
1181  
1182 Line 281 “compensating changes in temperature and accumulation due to AMOC” is not discussed before  
1183 and should be better explained earlier in paper  
1184 This is now discussed more fully earlier e.g.: In G4, changes in Atlantic Ocean circulation may increase  
1185 VIC temperatures. Projections by all ESM with data show AMOC index at 30°N is 0–4 Sv stronger in  
1186 G4 than RCP4.5 (Fig. 9a), which acts to increase heat flux from ocean to atmosphere near Iceland (Fig.  
1187 9d). However, the atmospheric cooling associated with G4 SAI dominates the VIC climate, resulting in  
1188 a 0.4°C reduction of air temperature and a 6% lower surface melt-runoff under G4. There are across



1189 model differences, with the two MIROC projecting little changes between G4 and RCP4.5 in  
1190 temperatures and precipitation, and hence the response of ice cap volume. Precipitation is the main  
1191 component of mass accumulation, all ESMS project insignificant precipitation differences between G4  
1192 and RCP4.5. This is different from the global (Trisos et al., 2018) and Greenland (Moore et al., 2019)  
1193 cases where G4 reduces precipitation in most regions, due to the fundamental difference between long  
1194 wave greenhouse gas and shortwave SAI radiative forcing. Greenhouse gases are distributed throughout  
1195 the atmosphere, while shortwave radiation impacts surface temperatures, hence temperature lapse rates  
1196 are altered under SAI and the atmosphere is drier than it would be for the same temperature under simple  
1197 greenhouse gas climates. The changes precipitation under G4 that are seen in VIC may be driven by the  
1198 relatively enhanced AMOC and lower Arctic sea ice (Xie et al., 2022) which in turn brings more water  
1199 vapor to VIC.

1200

1201

1202 Line 283 “VIC is relatively insensitive to climate scenario” does not make sense here, suggest to edit or  
1203 delete

1204 Rephrased “mean that the mass balance of VIC is much less dependent on climate scenario than glaciers  
1205 in many other regions.”

1206 Line 283 “relatively unaffected by changing air and ocean temperature” is not clear, ocean temperature  
1207 does not affect dynamics as VIC is not in connection to ocean and the results of the study show that the  
1208 dynamics is affected through changes in geometry of the ice cap. Suggest to edit or delete.

1209 Iceland is surrounded by the sea. AMOC changes ocean temperatures and has an impact on the climate  
1210 of Iceland, making it much milder than places at the same latitude. Hence ocean temperatures in this  
1211 sentence:

1212 “We find that ice dynamics are almost constant over both time and scenario because they are relatively  
1213 unaffected by changing air and ocean temperatures.”

1214

1215 Line 384 the paper by Schmidt et al is now published and this reference should be replaced by the  
1216 Cryosphere paper

1217 Done.

1218

1219 Line 388 two places there should be ð instead of o: Aðalgeirsdóttir and Guðmundsson

1220 Done.
